# Supplementary material for: Direct amidation of azoles with formamides via metal-free C–H activation in the presence of tert-butyl perbenzoate
Source: Royal Society of Chemistry journal article supplement (doi:10.1039/c1cc13086b), 2011-01-01
Supplement: c1cc13086b.pdf [file c1cc13086b.pdf]

Supplementary Material (ESI) for Chemical Communications

This journal is (c) The Royal Society of Chemistry 2011

## Direct amidation of azoles with formamides via metal-free C–H activation in the presence of *tert*-butyl perbenzoate

Tao He,<sup>a</sup> Hongji Li,<sup>a</sup> Pinhua Li,<sup>a</sup> and Lei Wang<sup>\*a,b</sup>

<sup>a</sup> Department of Chemistry, Huaibei Normal University, Huaibei, Anhui 235000, P R China

Tel: + 86-561-3802-069 Fax: + 86-561-3090-518 E-mail: leiwang@chnu.edu.cn

<sup>b</sup> State Key Laboratory of Organometallic Chemistry, Shanghai Institute of Organic Chemistry, Chinese Academy of Sciences, Shanghai 200032, P R China

### Table of Contents for Supporting Information

|            |                                                                             |                     |                  |
|------------|-----------------------------------------------------------------------------|---------------------|------------------|
| 1:         | Physical                                                                    | measurements        | and              |
| materials  | .....S1                                                                     |                     |                  |
| 2:         | Typical procedure for the amidation of benzthiazoles with formamides.....S1 |                     |                  |
| 3:         | Optimization                                                                | of                  | partial reaction |
| conditions | .....S2                                                                     |                     |                  |
| 4:         | Characterization data for the amidation of azoles with formamides.....S2    |                     |                  |
| 5:         | <sup>1</sup> H NMR,                                                         | <sup>13</sup> C NMR | spectra and HRMS |
| data       | .....S8                                                                     |                     |                  |
| 6:         | References.....S31                                                          |                     |                  |

#### 1. Physical measurements and materials

All <sup>1</sup>H NMR and <sup>13</sup>C NMR spectra were recorded on a 400 MHz Bruker FT-NMR spectrometers. All chemical shifts are given as  $\delta$  value (ppm) with reference to tetramethylsilane (TMS) as an internal standard. High resolution mass spectroscopy data of the product were collected on a Waters Micromass GCT instrument. Products were purified by flash chromatography on 100–200 mesh silica gels, SiO<sub>2</sub>. Unless otherwise noted, the chemicals and solvents were purchased from commercial suppliers either from Aldrich, USA or Shanghai Chemical Company, China and were used without purification prior to use.

#### 2. Typical procedure for amidation of benzthiazole with formamides

A suspension of *tert*-butyl perbenzoate (TBPB, 194 mg, 1.0 mmol), benzothiazole (68 mg, 0.5 mmol), dimethylformamide (DMF, 146 mg, 2.0 mmol), in toluene (3.0 mL) was stirred at 100 °C for 12 h. The reaction mixture was diluted with ethyl acetate (10.0 mL), washed with water (5.0

mL×2) and brine, dried over Mg<sub>2</sub>SO<sub>4</sub>. After the solvent was removed under reduced pressure, the residue was purified by column chromatography on silica gel (hexane/EtOAc, 5:1) to afford the direct cross-coupling product, *N,N*-dimethylbenzothiazole-2-carboxamide (**3a**, 77 mg, 75% yield).

### 3. Optimization of partial reaction conditions

**Table** Optimization of partial reaction conditions in the direct amidation of **1a** with **2a**<sup>a</sup>

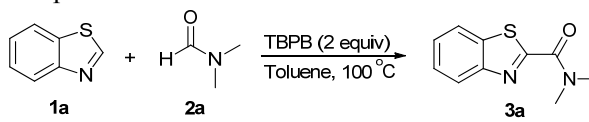

**1a** + **2a**  $\xrightarrow[\text{Toluene, 100 } ^\circ\text{C}]{\text{TBPB (2 equiv)}}$  **3a**

| Entry          | Transition metal catalyst (mol%) | Yield (%) <sup>b</sup> |
|----------------|----------------------------------|------------------------|
| 1              | FeBr <sub>2</sub> (10)           | 20                     |
| 2 <sup>c</sup> | Pd(OAc) <sub>2</sub> (10)        | N.R.                   |
| 3              | —                                | 75                     |
| 4 <sup>d</sup> | —                                | 51                     |
| 5 <sup>e</sup> | —                                | 75                     |

<sup>a</sup>Reaction conditions: **1a** (0.5 mmol), **2a** (2.0 mmol), TBPB (1.0 mmol), toluene (3.0 mL), 100 °C for 12 h. <sup>b</sup>Isolated yield. <sup>c</sup>CF<sub>3</sub>CO<sub>2</sub>H (0.1 mmol) was added. <sup>d</sup>TBPB (0.75 mmol) was used. <sup>e</sup>TBPB (1.5 mmol) was used.

### 4. Characterization data for the amidation of azoles with formamides

#### *N,N*-Dimethylbenzothiazole-2-carboxamide<sup>[1]</sup>

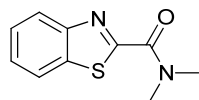

**3a**: *n*-hexane/EtOAc (5:1); pale yellow solid (77 mg, 75%); <sup>1</sup>H NMR (400 MHz, CDCl<sub>3</sub>); δ = 8.09 (d, *J* = 8.0 Hz, 1H), 7.95 (d, *J* = 8.0 Hz, 1H), 7.56–7.44 (m, 2H), 3.64 (s, 3H), 3.21 (s, 3H); <sup>13</sup>C NMR (100 MHz, CDCl<sub>3</sub>); δ = 164.82, 161.23, 153.15, 136.13, 126.53, 126.40, 124.52, 121.78, 38.76, 37.23.

#### *N*-Ethylbenzothiazole-2-carboxamide

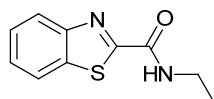

**3b:** *n*-hexane/EtOAc (5:1); pale yellow solid (72 mg, 70%);  $^1\text{H}$  NMR (400 MHz,  $\text{CDCl}_3$ );  $\delta$  = 8.04 (d,  $J$  = 8.0 Hz, 1H), 7.94 (d,  $J$  = 8.0 Hz, 1H), 7.58–7.43 (m, 3H), 3.61–3.49 (m, 2H), 1.33–1.26 (m, 3H);  $^{13}\text{C}$  NMR (100 MHz,  $\text{CDCl}_3$ );  $\delta$  = 164.09, 159.62, 152.73, 136.91, 126.65, 126.51, 124.04, 122.30, 34.67, 14.66. HRMS (EI) ( $[\text{M}]^+$ ) Calcd. for  $\text{C}_{10}\text{H}_{10}\text{N}_2\text{OS}$ : 206.0514, Found: 206.0509.

#### ***N*-(Tetrahydro-2*H*-pyran-4-yl)benzothiazole-2-carboxamide**

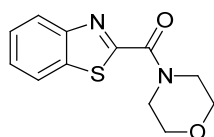

**3c:** *n*-hexane/EtOAc (5:1), pale yellow solid (71 mg, 58%);  $^1\text{H}$  NMR (400MHz,  $\text{CDCl}_3$ );  $\delta$  = 8.08 (d,  $J$  = 8.0 Hz, 1H), 7.97 (d,  $J$  = 8.0 Hz, 1H), 7.60–7.45 (m, 2H), 4.52 (t,  $J$  = 4.8 Hz, 2H), 3.91–3.79 (m, 6H);  $^{13}\text{C}$  NMR (100 MHz,  $\text{CDCl}_3$ );  $\delta$  = 164.44, 159.66, 153.01, 136.13, 126.75, 126.57, 124.59, 121.82, 67.19, 66.85, 47.13, 43.85. HRMS (EI) ( $[\text{M}]^+$ ) Calcd. for  $\text{C}_{12}\text{H}_{12}\text{N}_2\text{O}_2\text{S}$ : 248.0619, Found: 248.0616.

#### ***N*-Phenylbenzoxazole-2-carboxamide<sup>[1]</sup>**

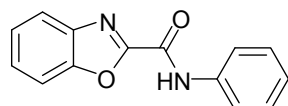

**3d:** *n*-hexane/EtOAc (5:1); pale yellow solid (79 mg, 67%);  $^1\text{H}$  NMR (400 MHz,  $\text{CDCl}_3$ );  $\delta$  = 9.11 (br, 1H), 7.86 (d,  $J$  = 7.6 Hz, 1H), 7.80–7.65 (m, 3H), 7.60–7.40 (m, 4H), 7.22 (t,  $J$  = 7.2 Hz, 1H);  $^{13}\text{C}$  NMR (100 MHz,  $\text{CDCl}_3$ );  $\delta$  = 155.45, 153.13, 151.36, 139.95, 136.69, 129.23, 127.60, 125.72, 125.27, 121.20, 119.85, 111.94.

#### ***N*-(*o*-Tolyl)benzoxazole-2-carboxamide**

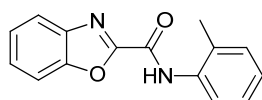

**3e:** *n*-hexane/EtOAc (5:1); yellow solid (81 mg, 65%);  $^1\text{H}$  NMR (400 MHz,  $\text{CDCl}_3$ );  $\delta$  = 9.06 (br, 1H), 8.16 (d,  $J$  = 8.0 Hz, 1H), 7.87 (d,  $J$  = 7.6 Hz, 1H), 7.72 (d,  $J$  = 8.0 Hz, 1H), 7.56–7.45 (m, 2H), 7.35–7.28 (m, 1H), 7.20–7.13 (m, 1H), 2.46 (s, 3H);  $^{13}\text{C}$  NMR (100 MHz,  $\text{CDCl}_3$ );  $\delta$  =

155.66, 153.23, 151.48, 140.08, 134.71, 130.64, 128.45, 127.56, 127.05, 125.72, 125.70, 122.02, 121.31, 111.96, 17.66. HRMS (EI) ( $[M]^+$ ) Calcd. for  $C_{15}H_{12}N_2O_2$ : 252.0899, Found: 252.0897.

#### ***N*-(*m*-Tolyl)benzoxazole-2-carboxamide**

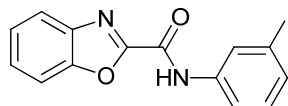

**3f:** *n*-hexane/EtOAc (5:1); yellow solid (86 mg, 69%);  $^1H$  NMR (400 MHz,  $CDCl_3$ ):  $\delta$  = 9.05 (br, 1H), 7.84 (d,  $J$  = 7.6 Hz, 1H), 7.71 (d,  $J$  = 8.0 Hz, 1H), 7.45–7.61 (m, 4H), 7.31 (t,  $J$  = 8.0 Hz, 1H), 7.04 (d,  $J$  = 7.6 Hz, 1H), 2.41 (s, 3H);  $^{13}C$  NMR (100 MHz,  $CDCl_3$ ):  $\delta$  = 155.60, 153.08, 151.45, 140.04, 139.26, 136.65, 129.08, 127.59, 126.14, 125.72, 121.23, 120.49, 117.02, 111.98, 21.50. HRMS (EI) ( $[M]^+$ ) Calcd. for  $C_{15}H_{12}N_2O_2$ : 252.0899, Found: 252.0900.

#### ***N*-(*p*-Tolyl)benzoxazole-2-carboxamide**

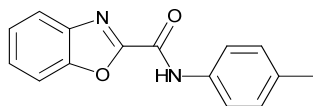

**3g:** *n*-hexane/EtOAc (5:1); yellow solid (92 mg, 73%);  $^1H$  NMR (400 MHz,  $CDCl_3$ ):  $\delta$  = 9.06 (br, 1H), 7.84 (d,  $J$  = 7.6 Hz, 1H), 7.70 (d,  $J$  = 7.6 Hz, 1H), 7.64 (d,  $J$  = 8.0 Hz, 2H), 7.55–7.43 (m, 2H), 7.22 (d,  $J$  = 8.0 Hz, 2H), 2.37 (s, 3H);  $^{13}C$  NMR (100 MHz,  $CDCl_3$ ):  $\delta$  = 153.01, 151.40, 140.03, 135.07, 134.19, 129.74, 127.54, 125.69, 121.18, 119.88, 111.95, 20.95. HRMS (EI) ( $[M]^+$ ) Calcd. for  $C_{15}H_{12}N_2O_2$ : 252.0899, Found: 252.0901.

#### ***N*-(4-Methoxyphenyl)benzoxazole-2-carboxamide**

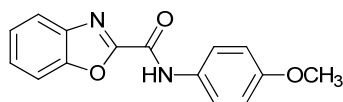

**3h:** *n*-hexane/EtOAc (5:1); yellow solid (95 mg, 71%);  $^1H$  NMR (400 MHz,  $CDCl_3$ ):  $\delta$  = 9.02 (br, 1H), 7.83 (d,  $J$  = 7.6 Hz, 1H), 7.63–7.54 (m, 3H), 7.55–7.44 (m, 2H), 6.96 (s, 1H), 6.94 (s, 1H), 3.83 (s, 3H);  $^{13}C$  NMR (100 MHz,  $CDCl_3$ ):  $\delta$  = 157.06, 155.68, 152.94, 151.39, 140.06, 129.87, 127.50, 125.68, 121.55, 121.16, 114.38, 111.94, 55.48. HRMS (EI) ( $[M]^+$ ) Calcd. for  $C_{15}H_{12}N_2O_3$ : 268.0848, Found: 268.0847.

#### **Benzoxazol-2-yl (piperidin-1-yl)methadone**

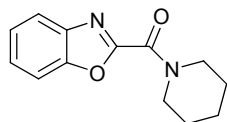

**3i:** *n*-hexane/EtOAc (5:1); yellow solid (71 mg, 62%);  $^1\text{H}$  NMR (400 MHz,  $\text{CDCl}_3$ ):  $\delta$  = 7.80 (d,  $J$  = 8.0 Hz, 1H), 7.62 (d,  $J$  = 8.0 Hz, 1H), 7.47–7.37 (m, 2H), 4.04–3.90 (m, 2H), 3.85–3.73 (m, 2H), 1.78–1.63 (m, 6H);  $^{13}\text{C}$  NMR (100 MHz,  $\text{CDCl}_3$ ):  $\delta$  = 156.24, 155.25, 149.82, 140.10, 126.76, 125.04, 121.09, 111.36, 47.98, 43.88, 26.57, 25.52, 24.36. HRMS (EI) ( $[\text{M}]^+$ ) Calcd. for  $\text{C}_{13}\text{H}_{14}\text{N}_2\text{O}_2$ : 230.1055, Found: 230.1056.

#### ***N*-Cyclohexylbenzoxazole-2-carboxamide**

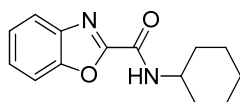

**3j:** *n*-hexane/EtOAc (5:1); yellow solid (80 mg, 66%);  $^1\text{H}$  NMR (400 MHz,  $\text{CDCl}_3$ ):  $\delta$  = 7.79 (d,  $J$  = 7.6 Hz, 1H), 7.67 (d,  $J$  = 7.6 Hz, 1H), 7.53–7.40 (m, 2H), 7.19 (br, 1H), 4.10–3.95 (m, 1H), 2.10–2.00 (m, 2H), 1.86–1.74 (m, 2H), 1.72–1.62 (m, 1H), 1.20–1.50 (m, 5H);  $^{13}\text{C}$  NMR (100 MHz,  $\text{CDCl}_3$ ):  $\delta$  = 155.74, 154.69, 151.09, 140.11, 127.24, 125.49, 121.05, 111.85, 48.82, 32.84, 25.36, 24.72. HRMS (EI) ( $[\text{M}]^+$ ) Calcd. for  $\text{C}_{14}\text{H}_{16}\text{N}_2\text{O}_2$ : 244.1212, Found: 244.1210.

#### **Benzoxazol-2-yl (morpholino)methanone**

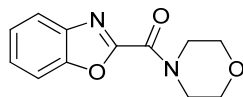

**3k:** *n*-hexane/EtOAc (5:1); pale yellow solid (69 mg, 60%);  $^1\text{H}$  NMR (400 MHz,  $\text{CDCl}_3$ ):  $\delta$  = 7.80 (d,  $J$  = 8.0 Hz, 1H), 7.65 (d,  $J$  = 8.0 Hz, 1H), 7.51–7.39 (m, 2H), 4.27 (t,  $J$  = 4.8 Hz, 2H), 3.91–3.75 (m, 6H);  $^{13}\text{C}$  NMR (100 MHz,  $\text{CDCl}_3$ ):  $\delta$  = 155.96, 154.51, 149.84, 140.02, 127.24, 125.29, 121.24, 111.52, 67.01, 66.67, 47.47, 43.23. HRMS (EI) ( $[\text{M}]^+$ ) Calcd. for  $\text{C}_{12}\text{H}_{12}\text{N}_2\text{O}_3$ : 232.0848, Found: 232.0853.

#### ***N,N*-Diethylbenzoxazole-2-carboxamide<sup>[2]</sup>**

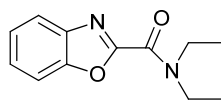

**3l:** *n*-hexane/EtOAc (5:1); yellow oil (74 mg, 68%);  $^1\text{H}$  NMR (400 MHz,  $\text{CDCl}_3$ ):  $\delta$  = 7.81 (d,  $J$

= 7.6 Hz, 1H), 7.63 (d,  $J = 8.0$  Hz, 1H), 7.49–7.38 (m, 2H), 3.90–3.79 (m, 2H), 3.69–3.56 (m, 2H), 1.33 (t,  $J = 7.2$  Hz, 3H), 1.29 (t,  $J = 7.2$  Hz, 3H);  $^{13}\text{C}$  NMR (100 MHz,  $\text{CDCl}_3$ ):  $\delta = 157.12, 155.39, 149.91, 140.33, 126.80, 125.03, 121.23, 111.40, 43.38, 41.26, 14.52, 12.55$ .

#### 5-Chloro-*N, N'*-Diethylbenzoxazole-2-carboxamide

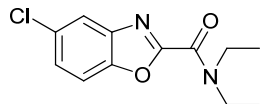

**3m:** *n*-hexane/EtOAc (5:1); pale yellow solid (90 mg, 72%);  $^1\text{H}$  NMR (400 MHz,  $\text{CDCl}_3$ ):  $\delta = 7.80$  (s, 1H), 7.56 (d,  $J = 8.8$  Hz, 1H), 7.43 (d,  $J = 8.8$  Hz, 1H), 3.86–3.78 (m, 2H), 3.67–3.56 (m, 2H), 1.33 (t,  $J = 7.2$  Hz, 3H), 1.29 (t,  $J = 7.2$  Hz, 3H);  $^{13}\text{C}$  NMR (100 MHz,  $\text{CDCl}_3$ ):  $\delta = 156.58, 156.47, 148.43, 141.33, 130.56, 127.28, 121.10, 112.20, 43.41, 41.36, 14.48, 12.50$ . HRMS (EI) ( $[\text{M}]^+$ ) Calcd. for  $\text{C}_{12}\text{H}_{13}\text{ClN}_2\text{O}_2$ : 252.0666, Found: 252.0665.

#### *N, N'*-Diethyl-5-methylbenzoxazole-2-carboxamide

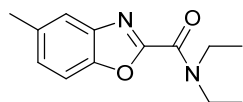

**3n:** *n*-hexane/EtOAc (5:1); pale yellow solid (62 mg, 53%);  $^1\text{H}$  NMR (400 MHz,  $\text{CDCl}_3$ ):  $\delta = 7.58$  (s, 1H), 7.48 (d,  $J = 8.4$  Hz, 1H), 7.25 (d,  $J = 8.4$  Hz, 1H), 3.88–3.78 (m, 2H), 3.64–3.56 (m, 2H), 2.48 (s, 3H), 1.31 (t,  $J = 7.2$  Hz, 3H), 1.28 (t,  $J = 7.2$  Hz, 3H);  $^{13}\text{C}$  NMR (100 MHz,  $\text{CDCl}_3$ ):  $\delta = 157.21, 155.48, 148.15, 140.53, 134.94, 128.03, 120.91, 110.70, 43.33, 41.21, 21.37, 14.48, 12.53$ . HRMS (EI) ( $[\text{M}]^+$ ) Calcd. for  $\text{C}_{13}\text{H}_{16}\text{N}_2\text{O}_2$ : 232.1212, Found: 232.1211.

#### *N*-Ethylthiazole-2-carboxamide

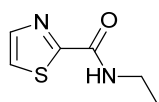

**3o:** *n*-hexane/EtOAc (5:1); yellow oil (53 mg, 68%);  $^1\text{H}$  NMR (400 MHz,  $\text{CDCl}_3$ ):  $\delta = 7.82$  (d,  $J = 4.0$  Hz, 1H), 7.54 (d,  $J = 3.2$  Hz, 1H), 7.30 (br, 1H), 3.55–3.45 (m, 2H), 1.25 (t,  $J = 7.2$  Hz, 3H);  $^{13}\text{C}$  NMR (100 MHz,  $\text{CDCl}_3$ ):  $\delta = 164.07, 159.25, 143.28, 124.31, 34.46, 14.67$ . HRMS (EI) ( $[\text{M}]^+$ ) Calcd. for  $\text{C}_6\text{H}_8\text{N}_2\text{OS}$ : 156.0357, Found: 156.0355.

#### *N*-Ethyl-4-methylthiazole-2-carboxamide

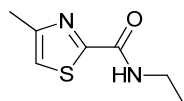

**3p:** *n*-hexane/EtOAc (5:1); yellow oil (54 mg, 63%);  $^1\text{H}$  NMR (400 MHz,  $\text{CDCl}_3$ ):  $\delta$  = 7.27 (br, 1H), 7.07 (s, 1H), 3.50–3.42 (m, 2H), 2.43 (s, 3H), 1.23 (t,  $J$  = 7.2 Hz, 3H);  $^{13}\text{C}$  NMR (100 MHz,  $\text{CDCl}_3$ ):  $\delta$  = 162.89, 159.34, 153.65, 119.11, 34.38, 16.87, 14.66. HRMS (EI) ( $[\text{M}]^+$ ) Calcd. for  $\text{C}_7\text{H}_{10}\text{N}_2\text{OS}$ : 170.0514, Found: 170.0510.

**Ethyl 2-(diethylcarbamoyl)oxazole-5-carboxylate**

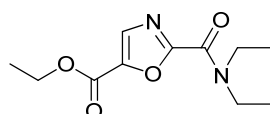

**3q:** *n*-hexane/EtOAc (5:1); pale yellow solid (71 mg, 59%);  $^1\text{H}$  NMR (400 MHz,  $\text{CDCl}_3$ ):  $\delta$  = 7.77 (s, 1H), 4.40–4.33 (m, 2H), 3.70–3.61 (m, 2H), 3.57–3.47 (m, 2H), 1.35 (t,  $J$  = 7.2 Hz, 3H), 1.24 (t,  $J$  = 7.2 Hz, 3H), 1.21 (t,  $J$  = 7.2 Hz, 3H);  $^{13}\text{C}$  NMR (100 MHz,  $\text{CDCl}_3$ ):  $\delta$  = 157.10, 156.52, 155.75, 142.87, 133.38, 61.72, 43.21, 41.16, 14.32, 14.05, 12.37. HRMS (EI) ( $[\text{M}]^+$ ) Calcd. for  $\text{C}_{11}\text{H}_{16}\text{N}_2\text{O}_4$ : 240.1110, Found: 240.1114.

### 5. $^1\text{H}$ NMR, $^{13}\text{C}$ NMR spectra and HRMS data

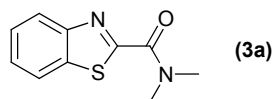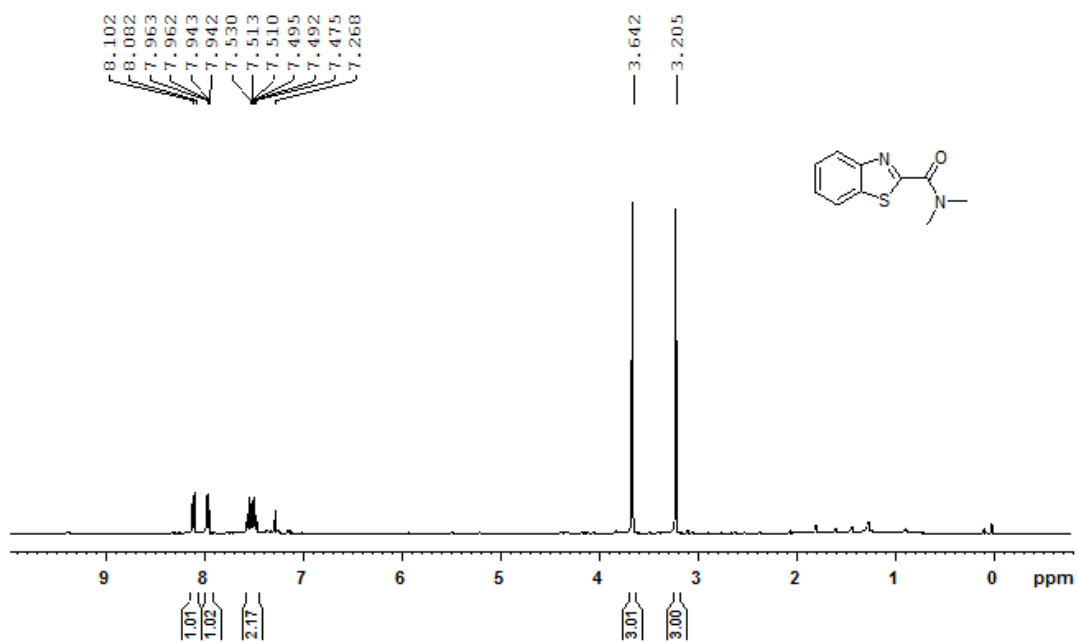



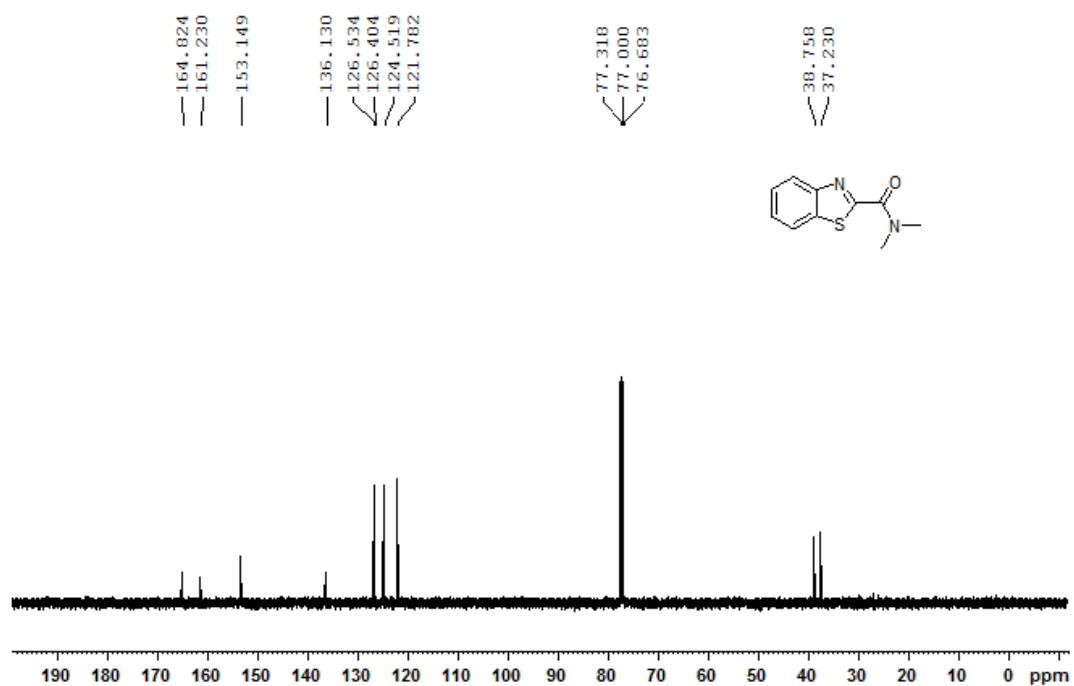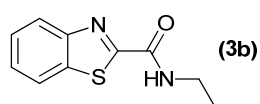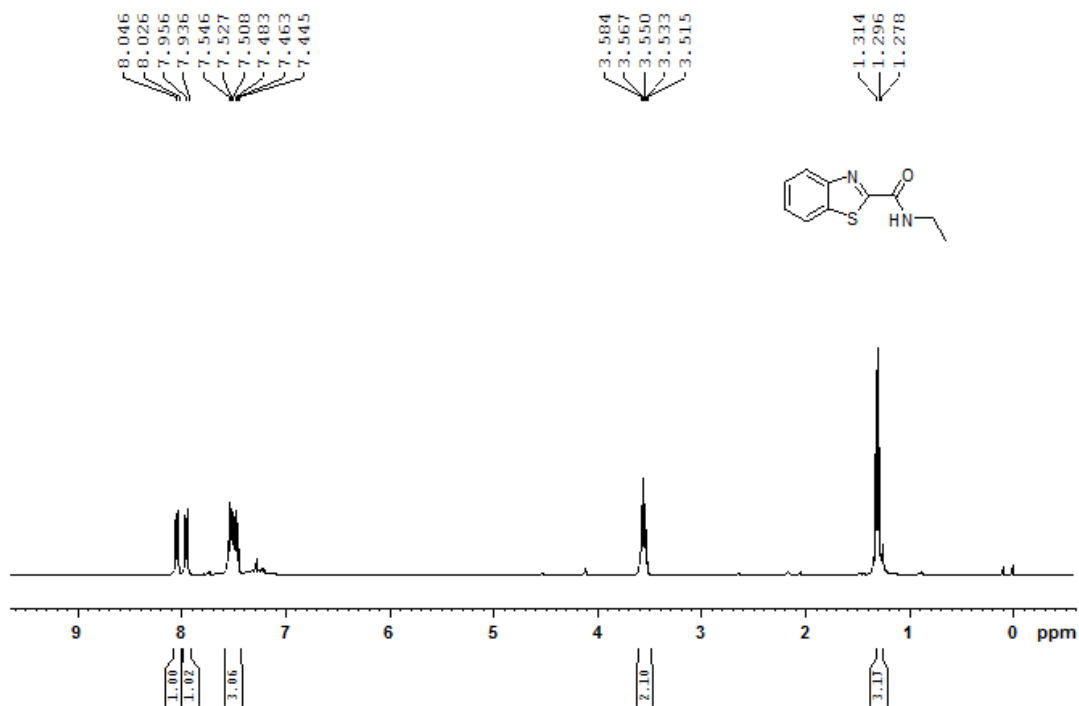

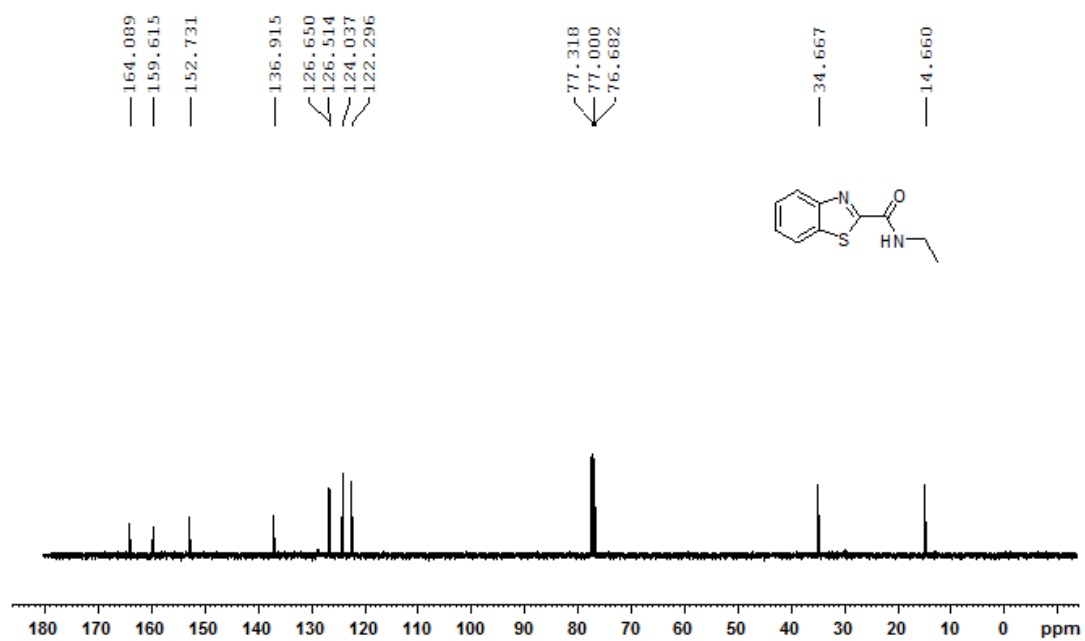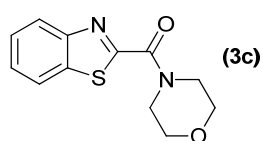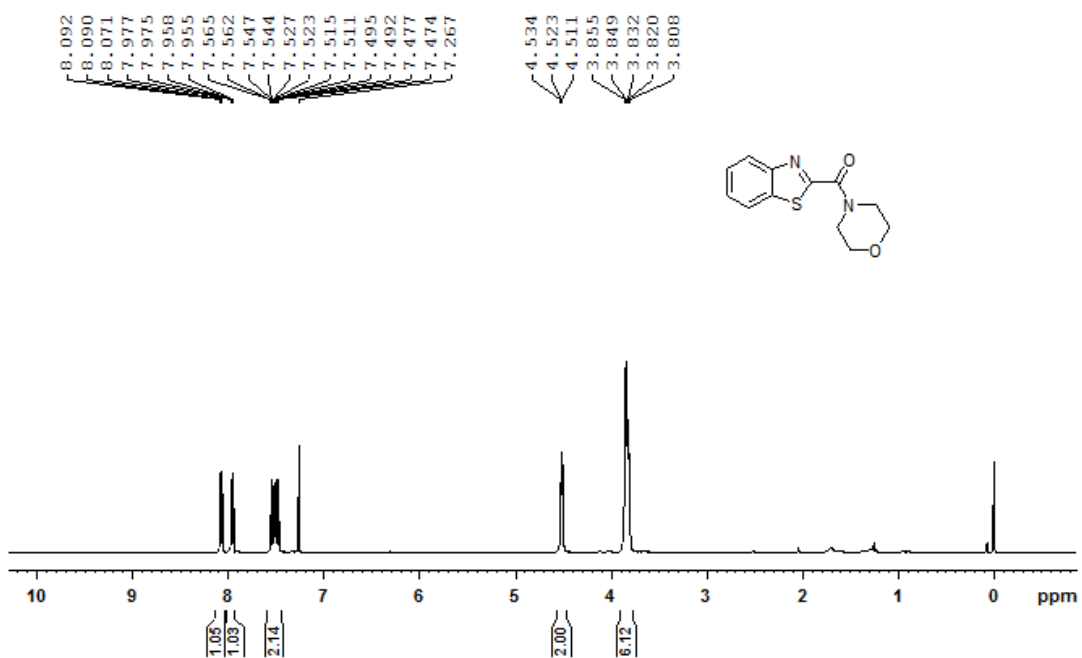

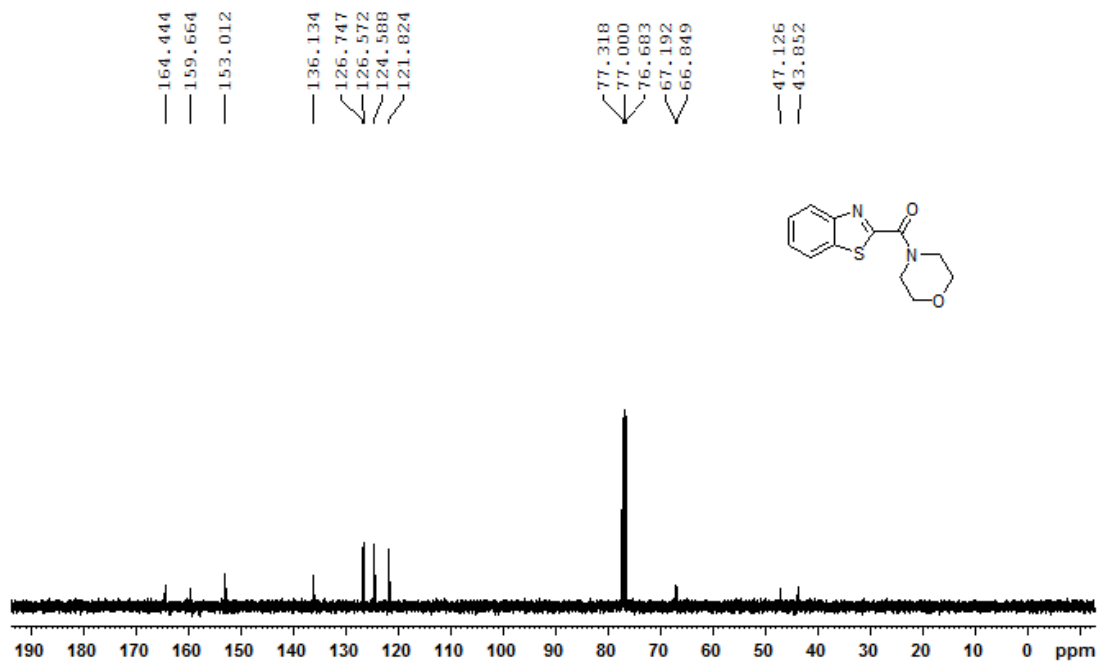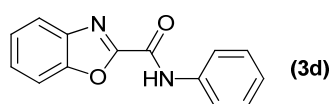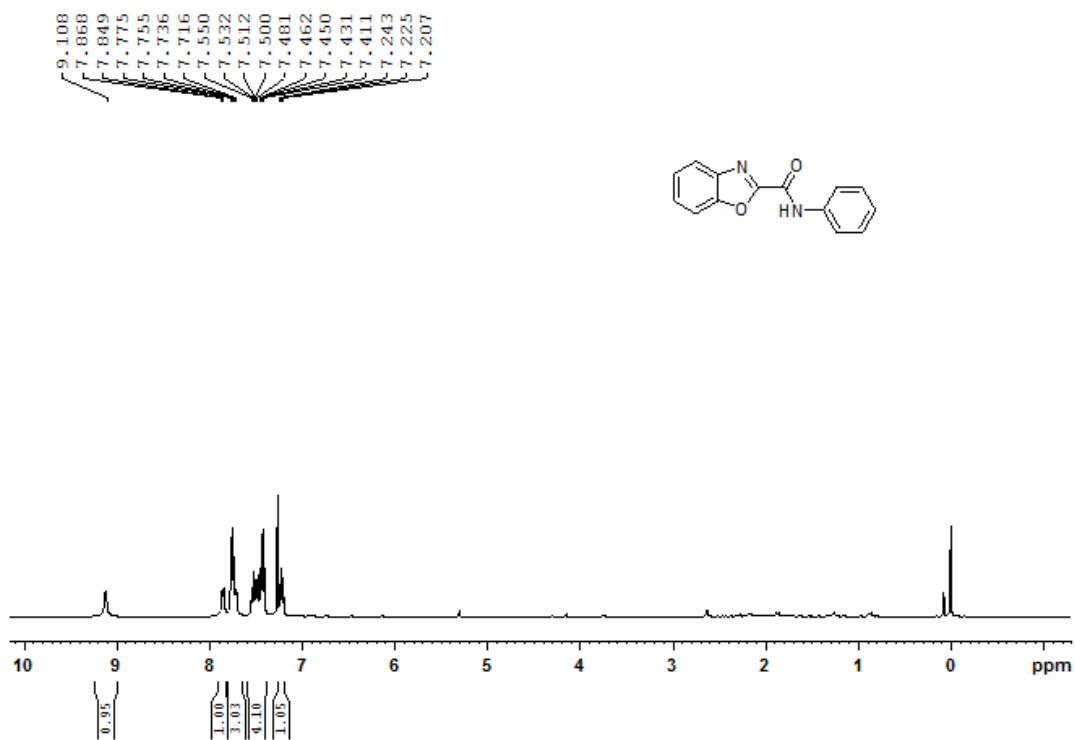

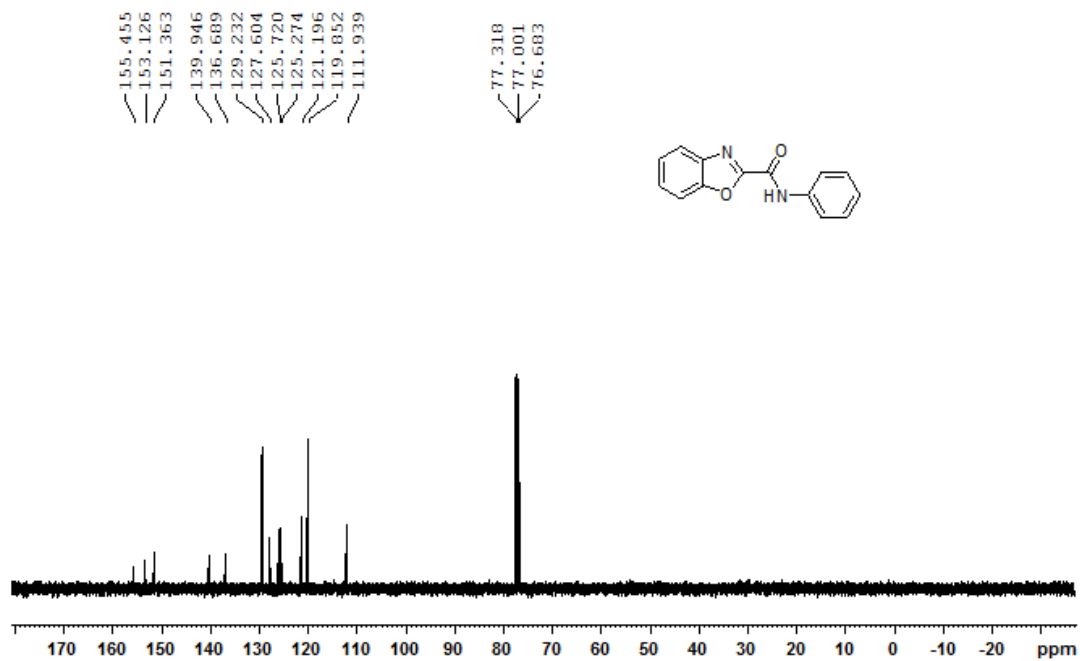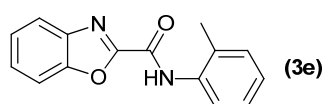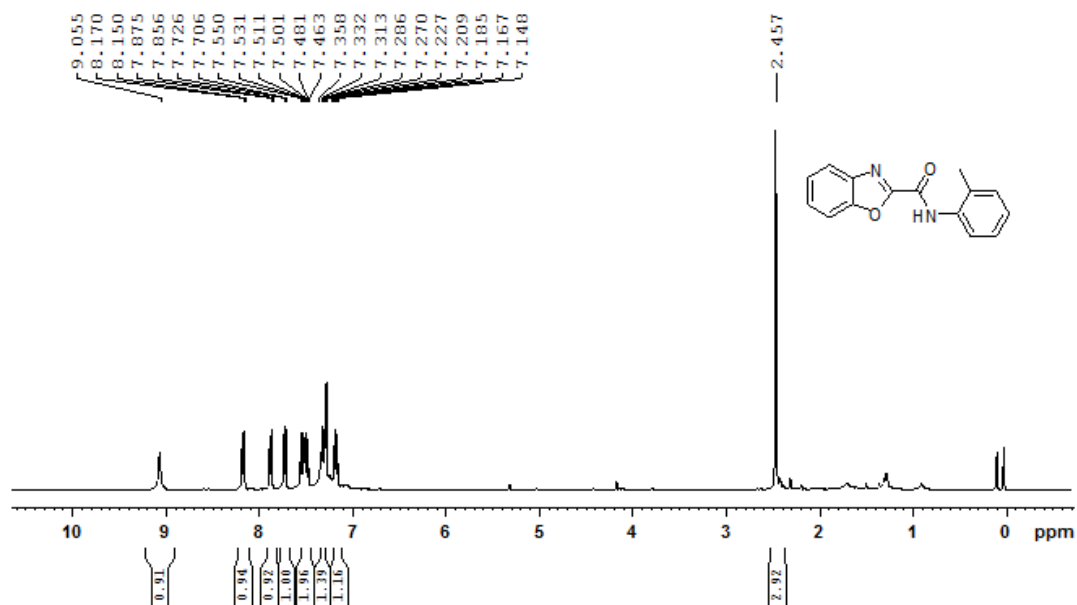

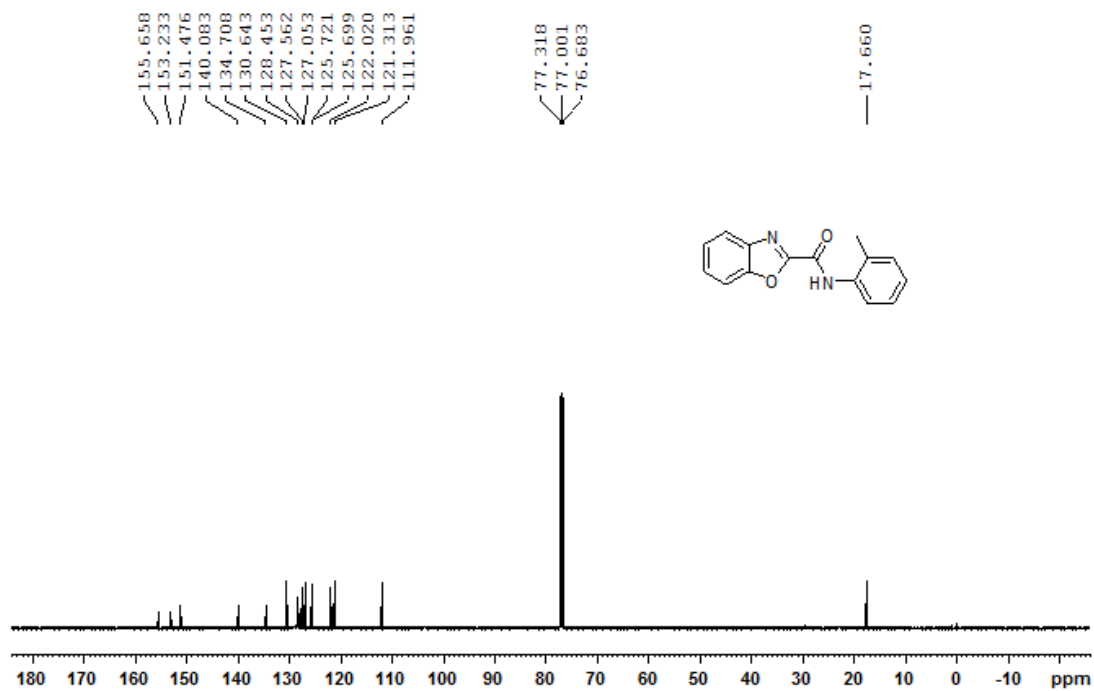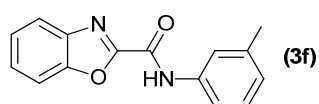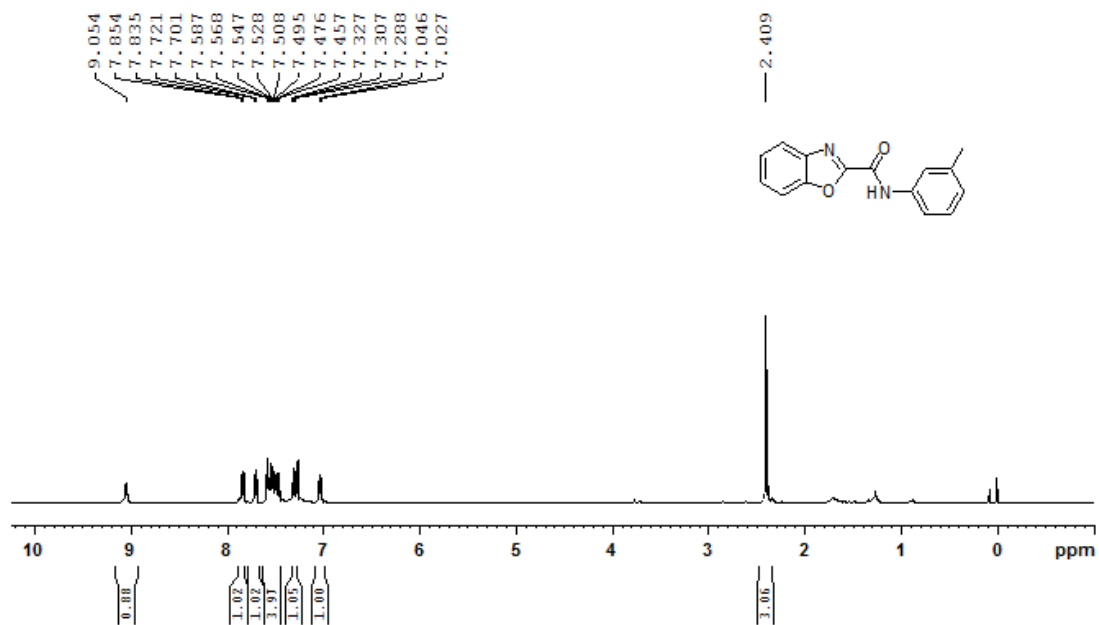

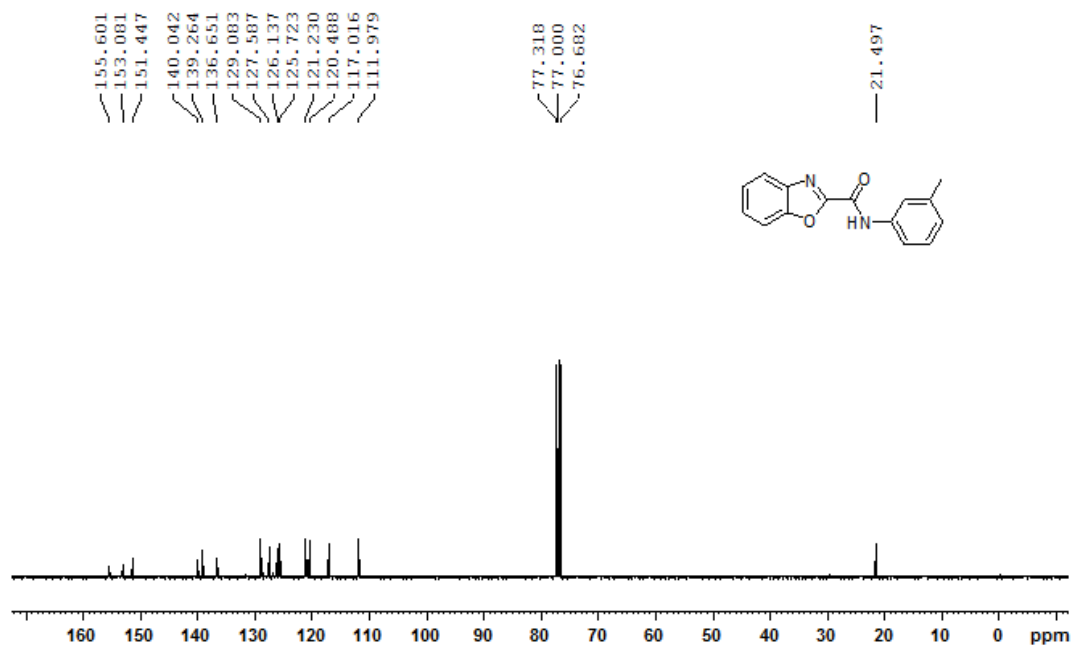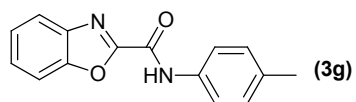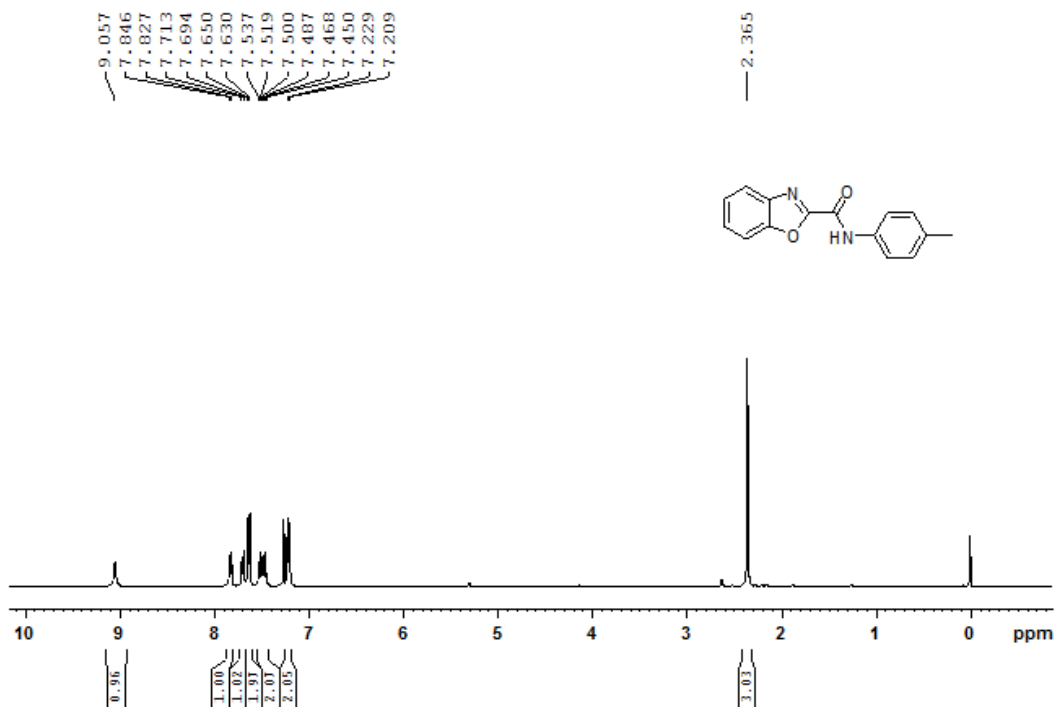

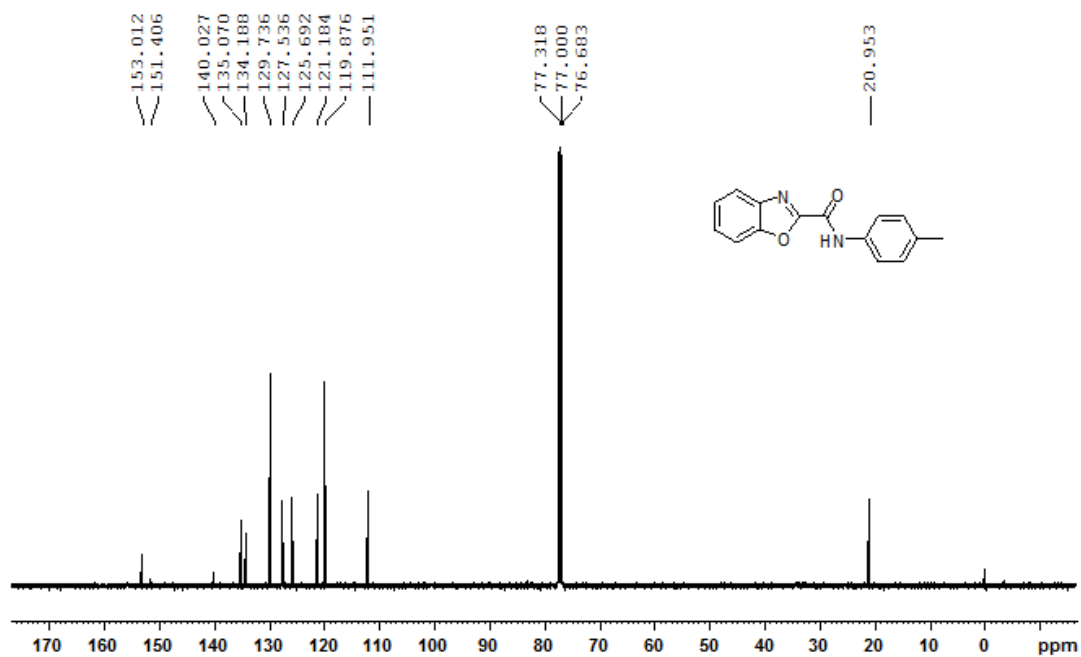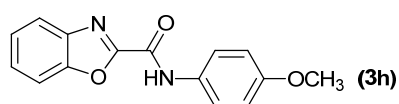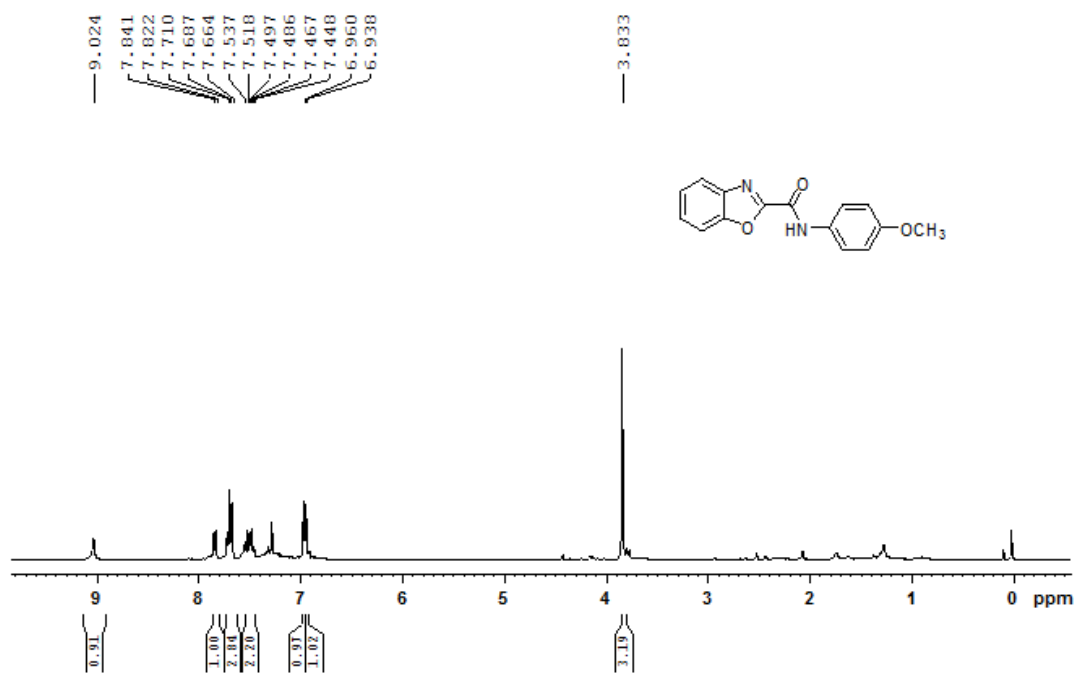

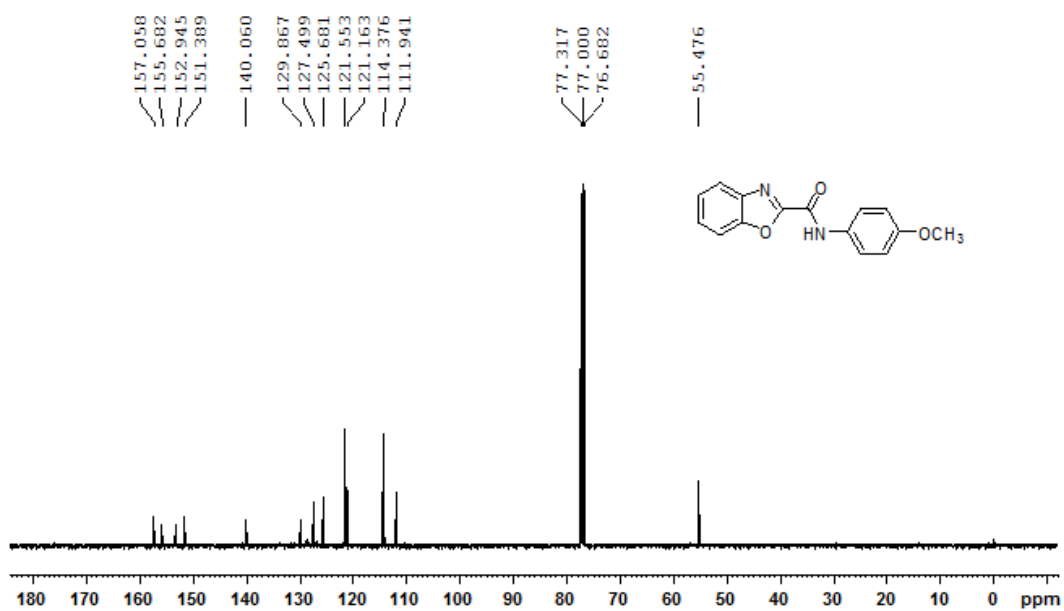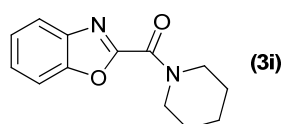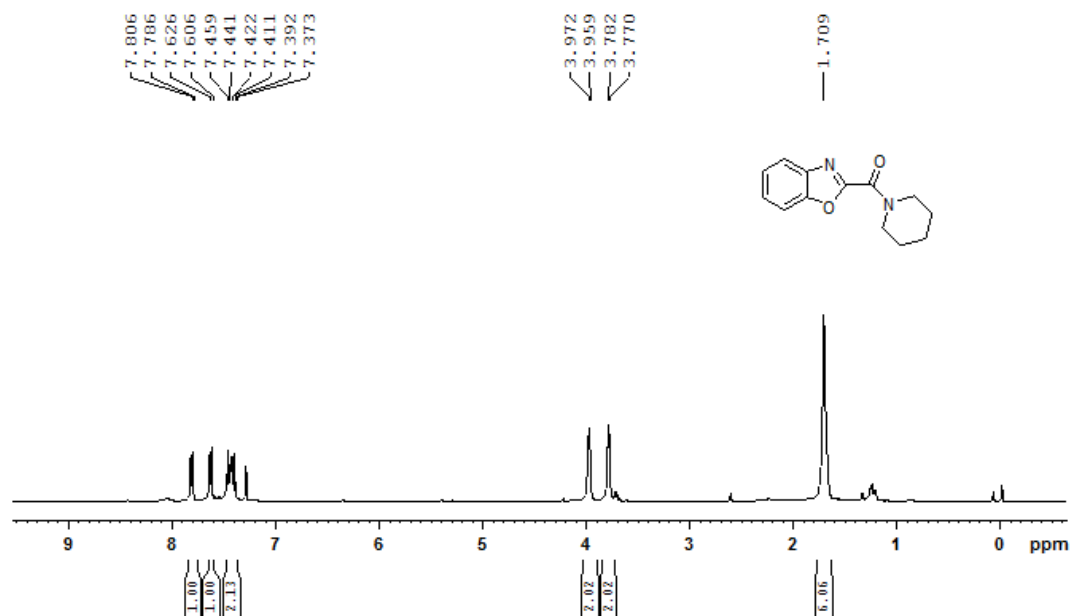



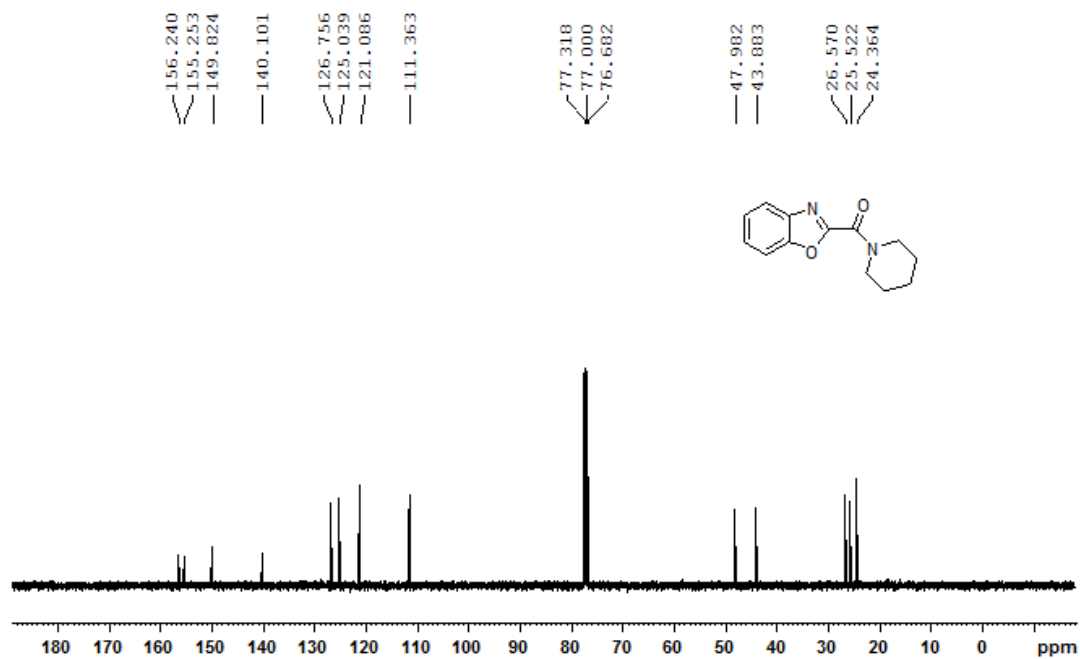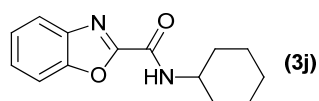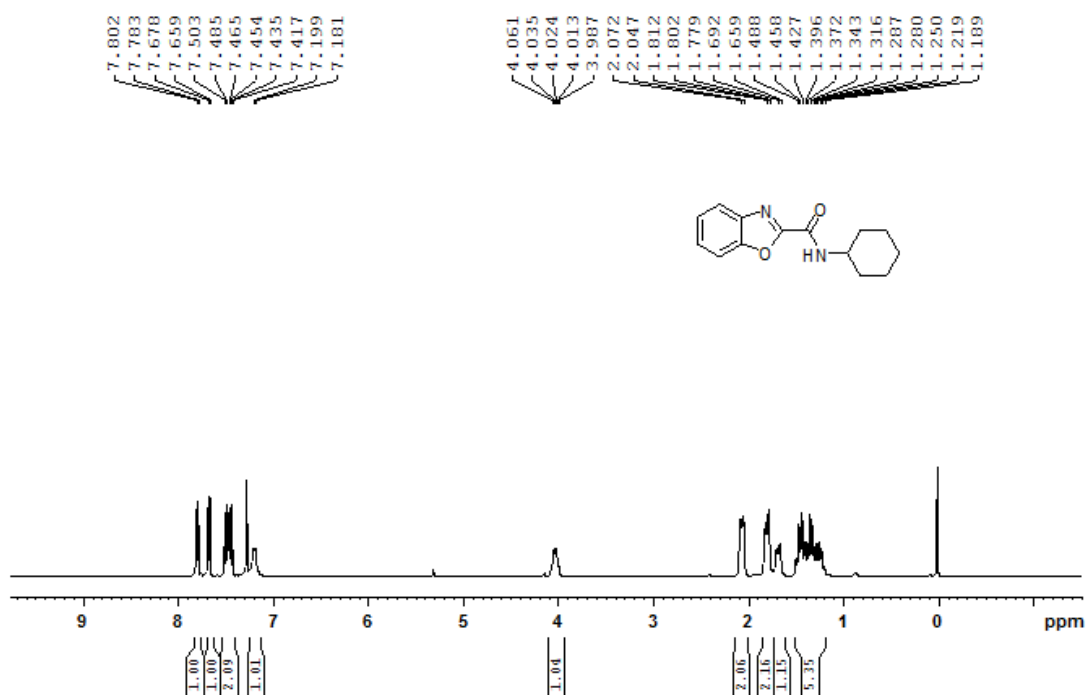

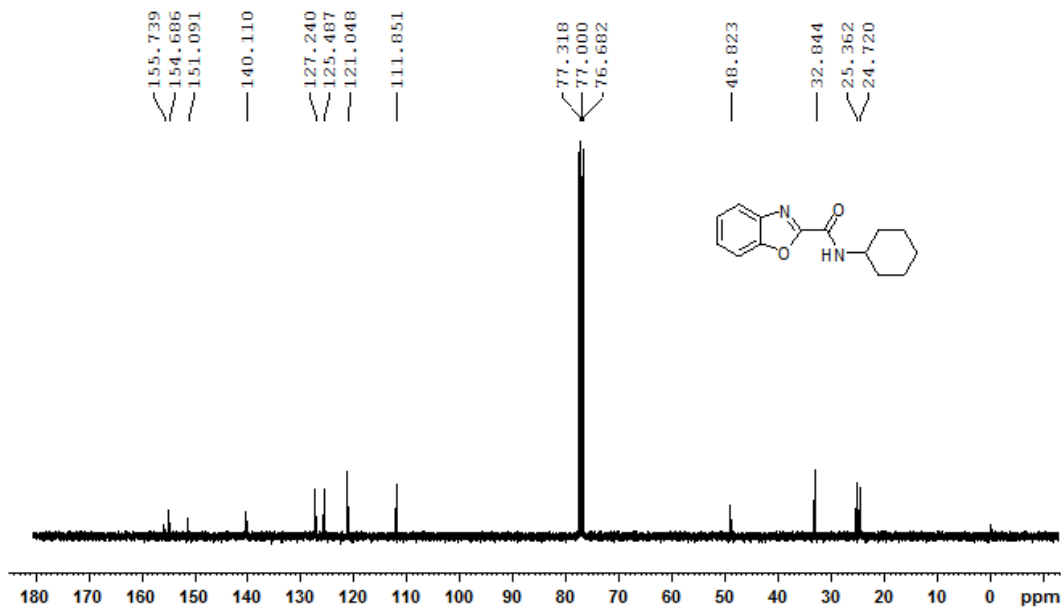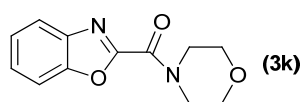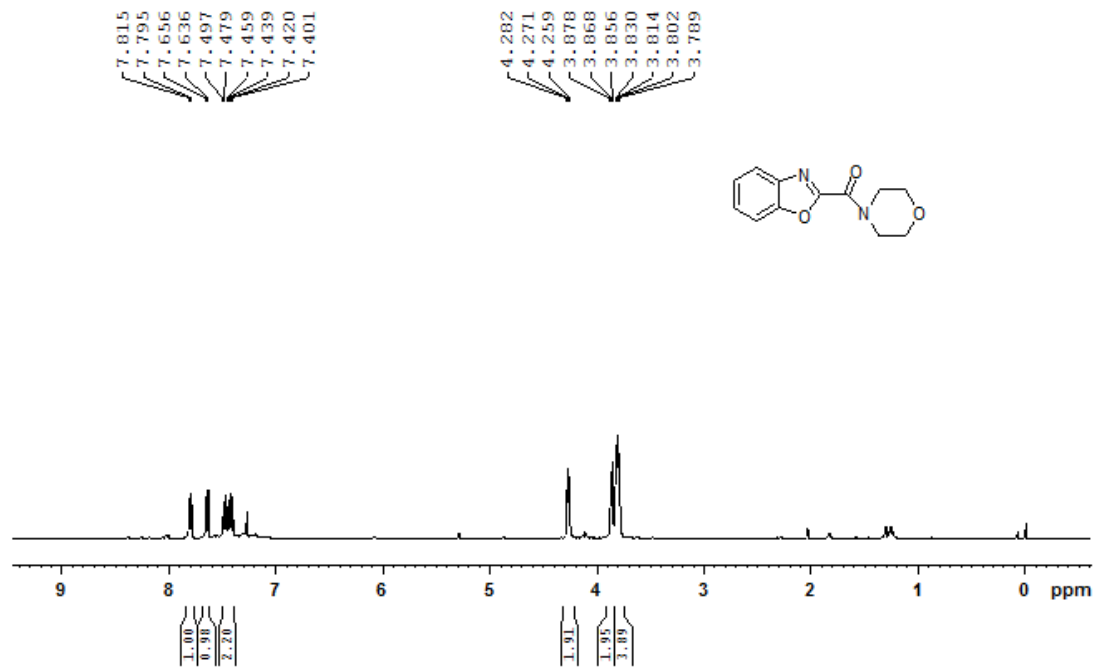

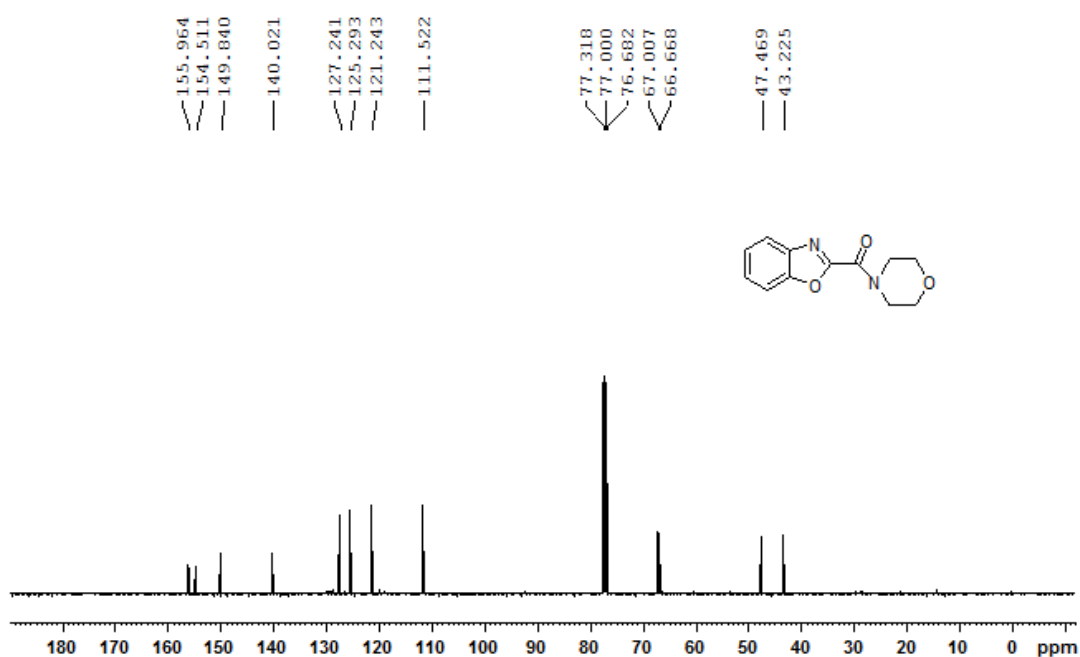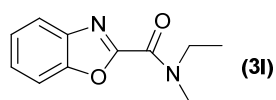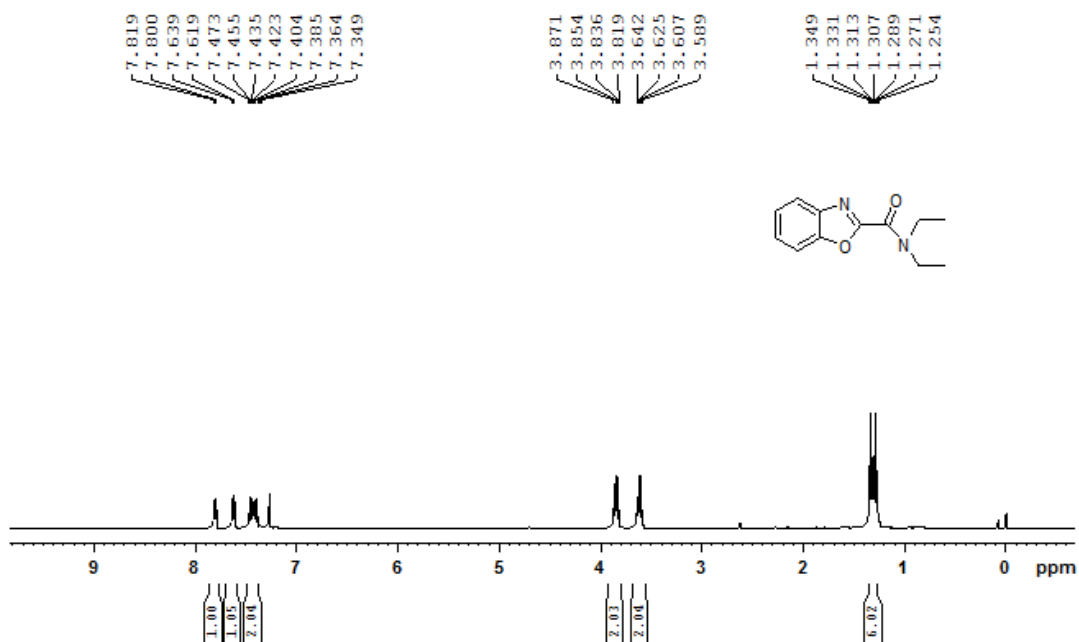

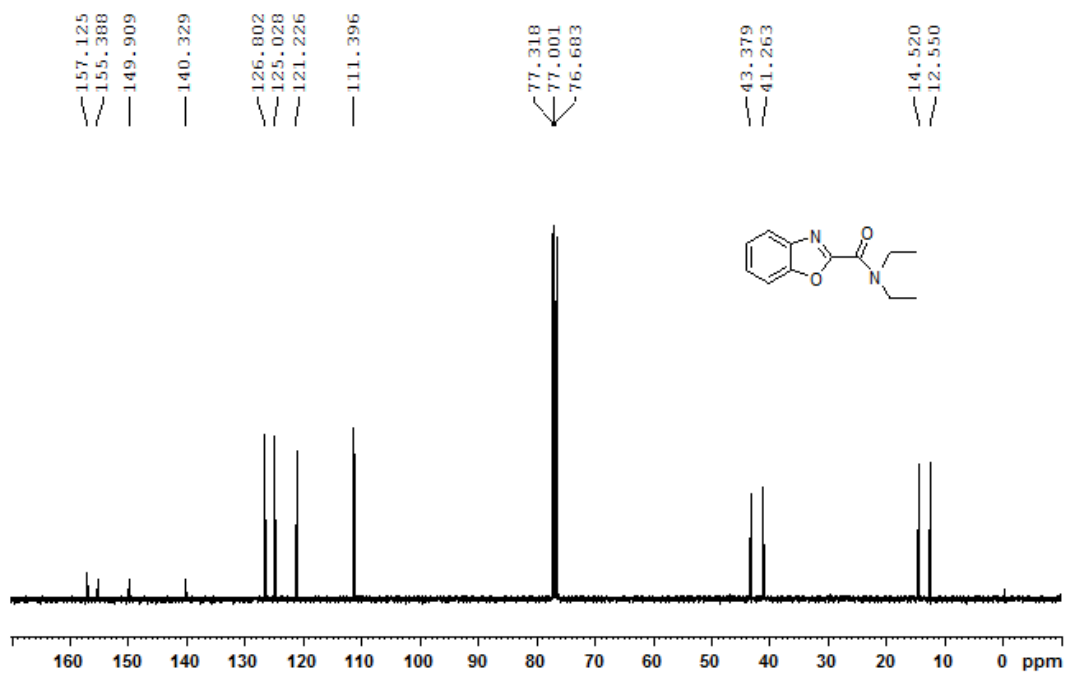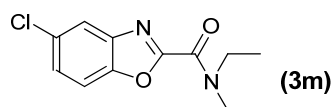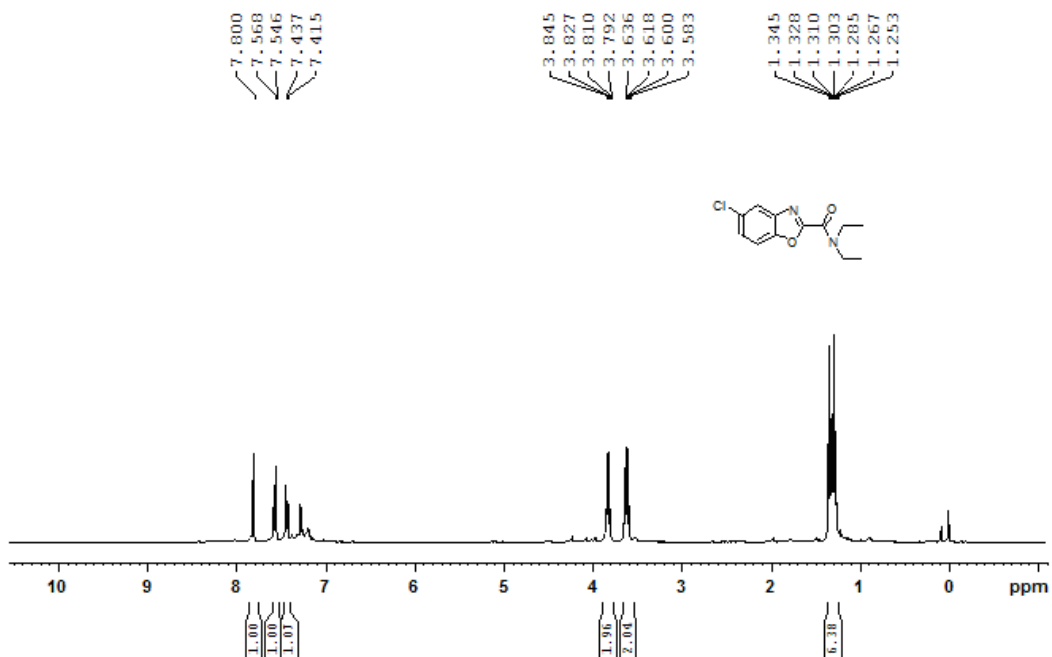

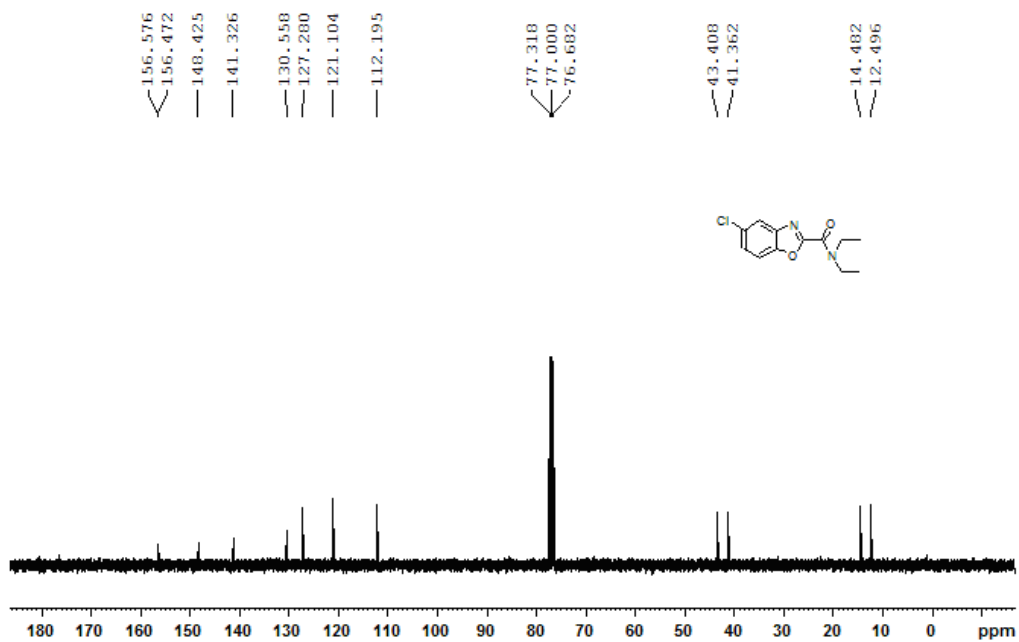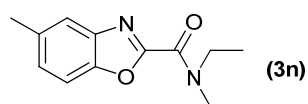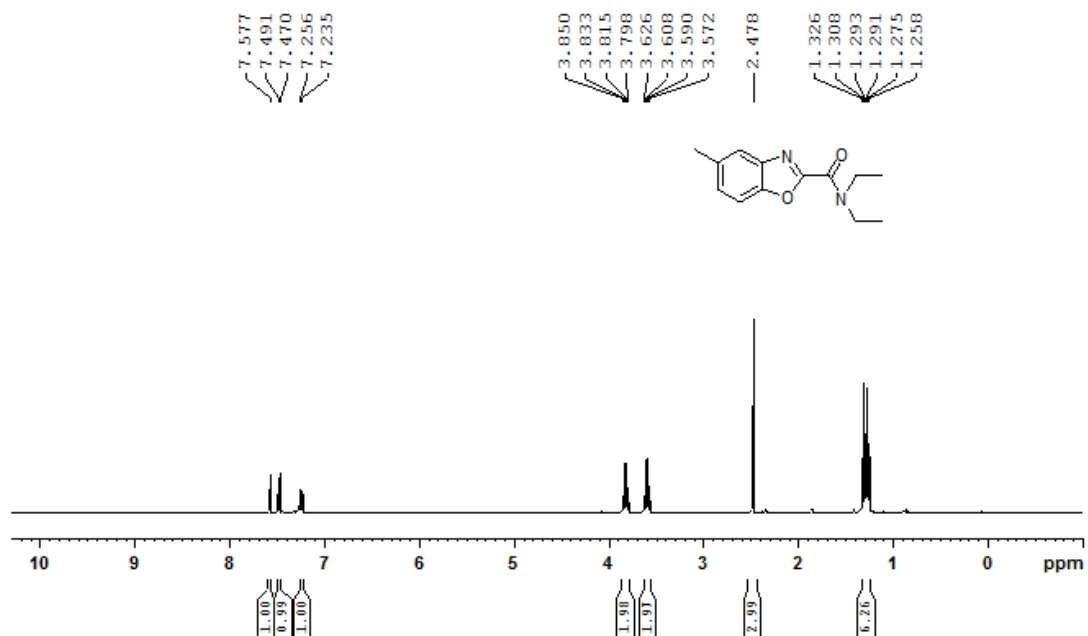

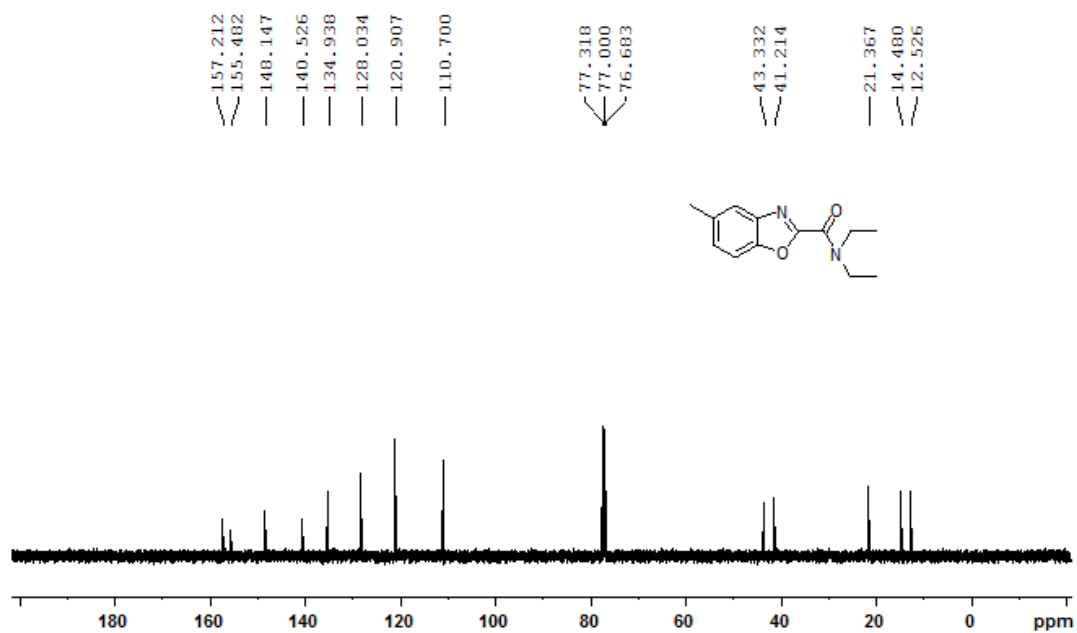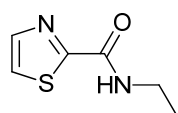

(3o)

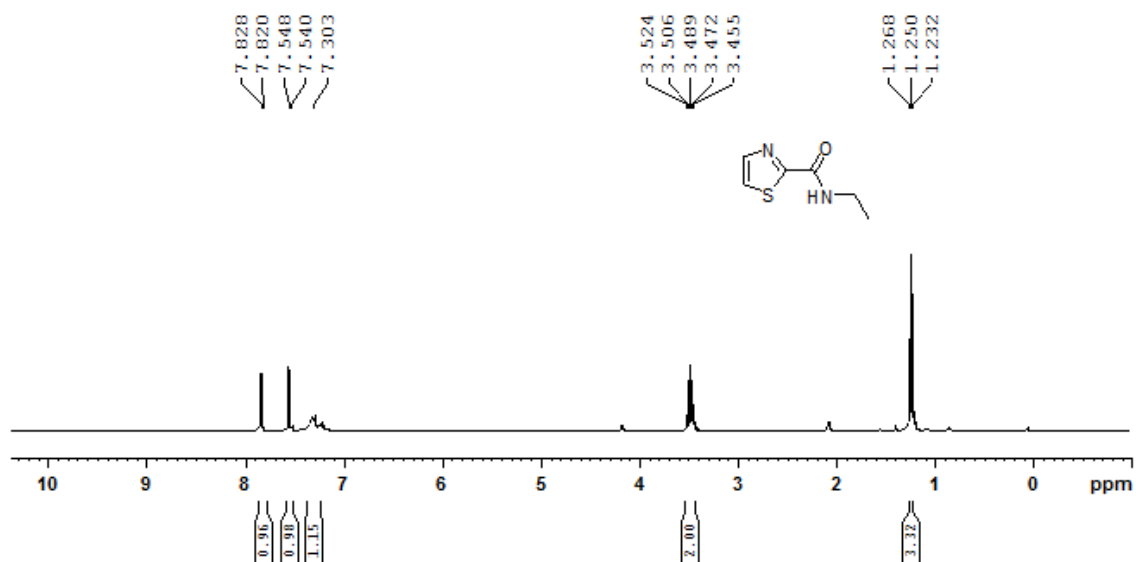

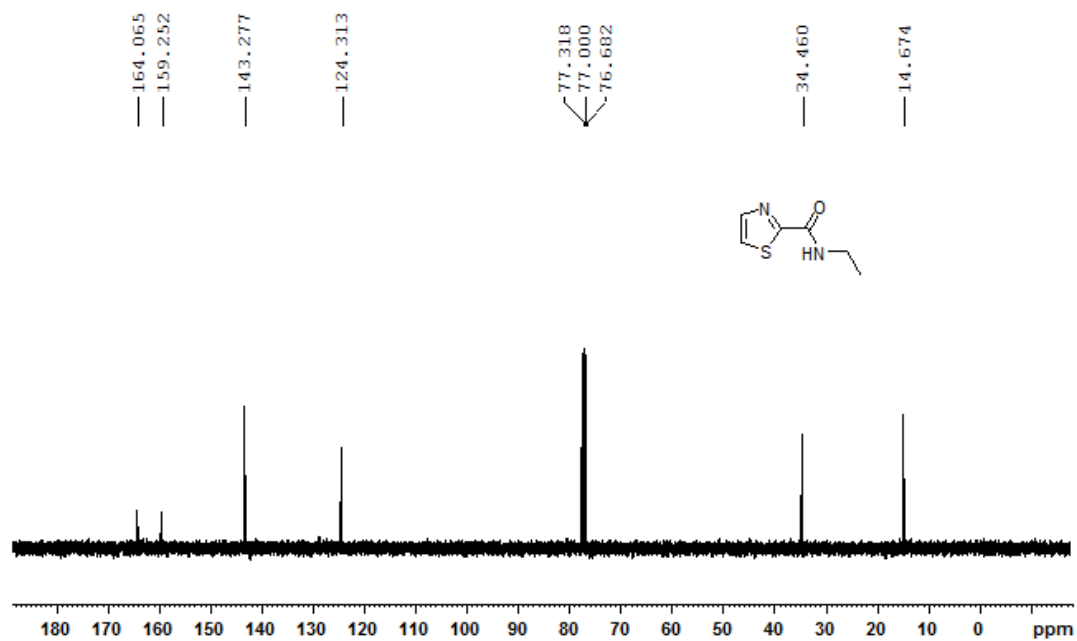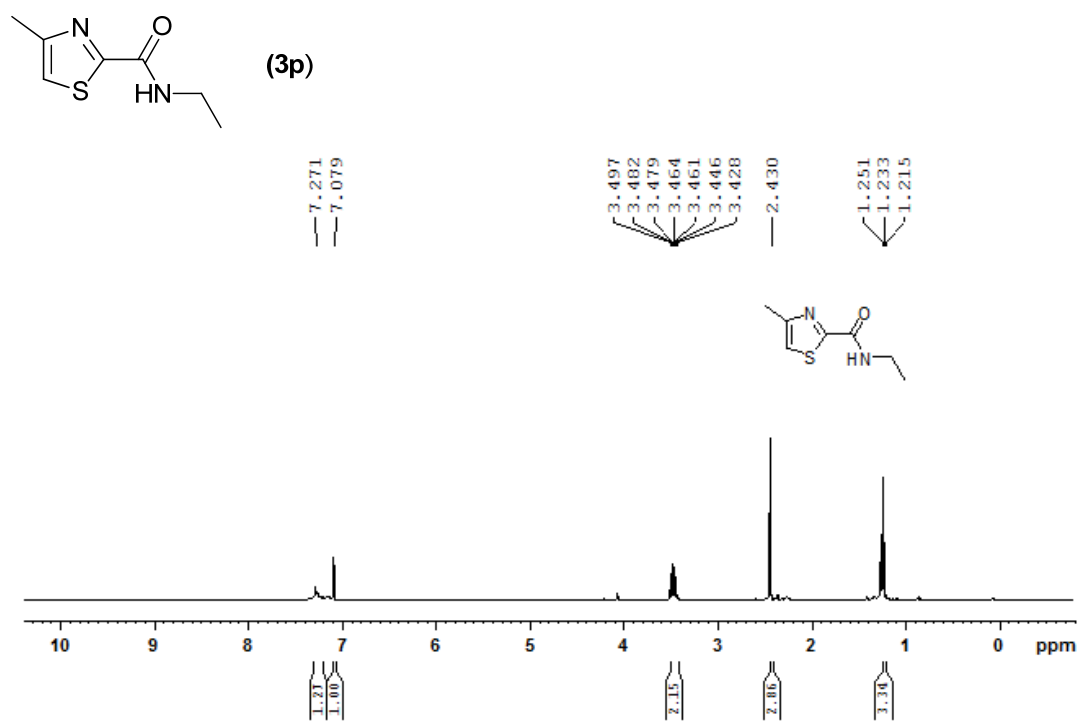

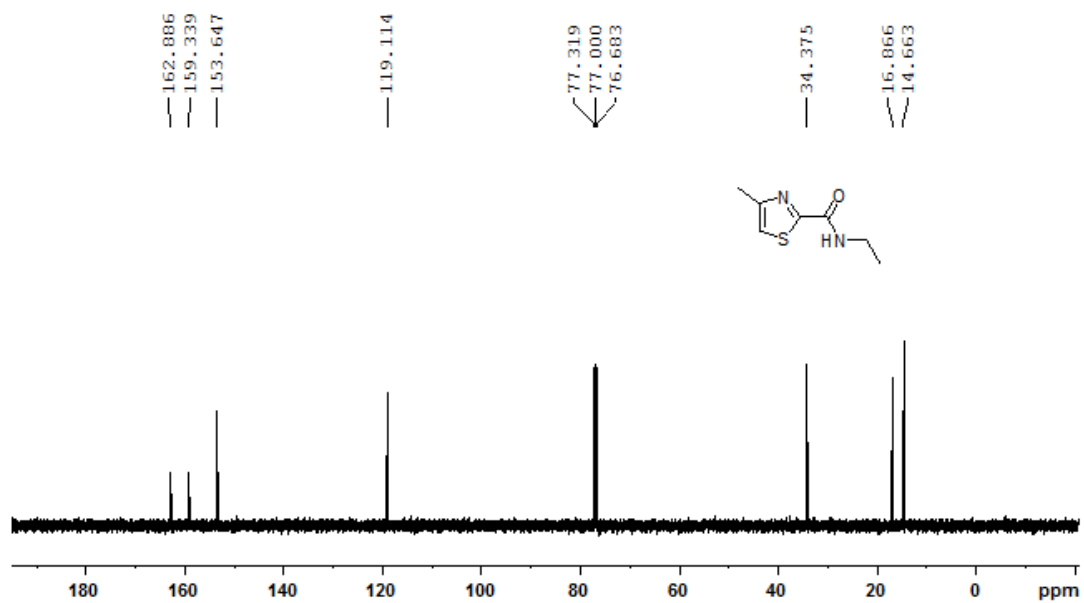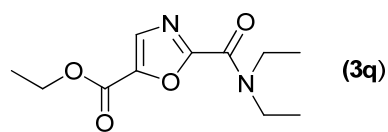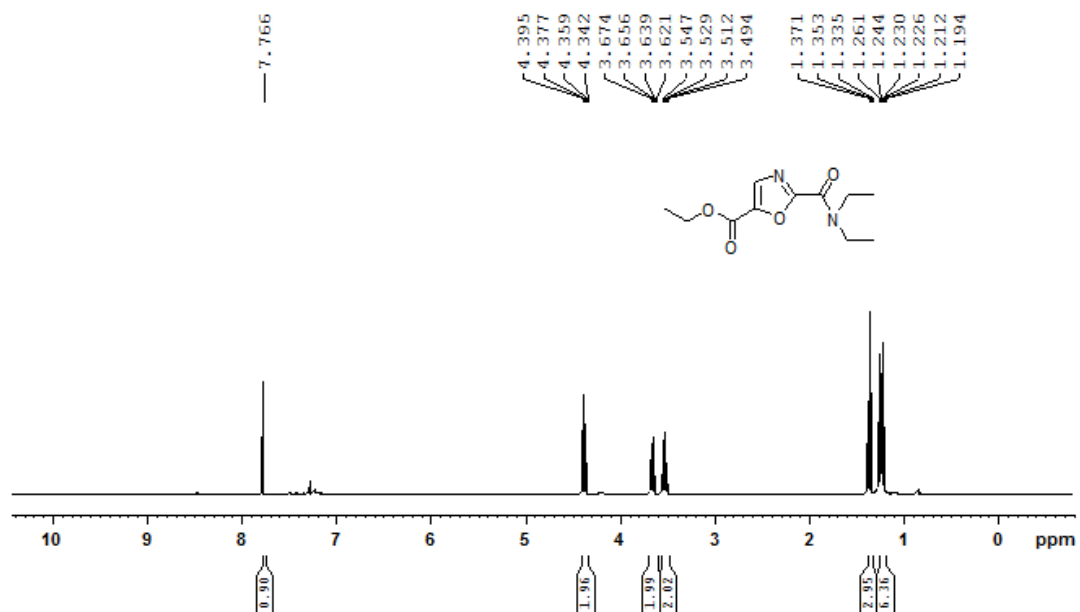



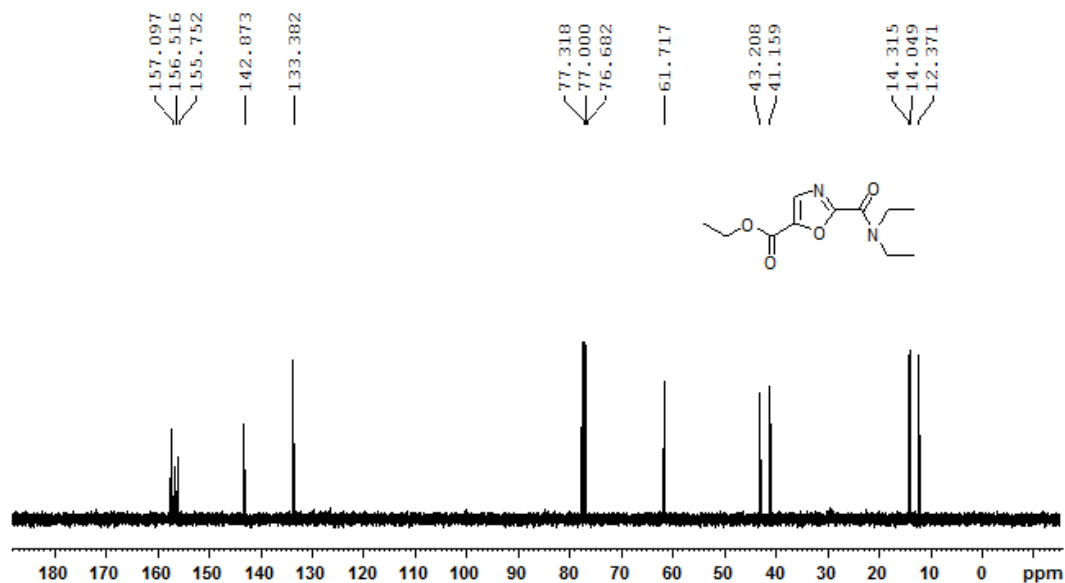

Center  
 Chemistry  
 Report

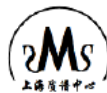

Shanghai Mass Spectrometry

Shanghai Institute of Organic  
 Chinese Academic of Sciences  
 High Resolution MS Data

Instrument: Waters Micromass GCT Premier Ionisation Mode: EI+ Electron Energy: 70eV  
 Card Serial Number: GCT-P-T11-04-050311

Sample Serial Number: HBSF-HT-9

Operator: Li

Date: 2011/04/28  
 Elemental Composition Report  
 Single Mass Analysis  
 Tolerance = 5.0 PPM / DBE: min = -1.5, max = 50.0  
 Element prediction: Off

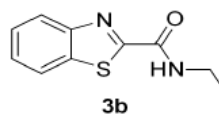

Monoisotopic Mass, Odd and Even Electron Ions  
 247 formula(e) evaluated with 2 results within limits (all results (up to 1000) for each mass)  
 Elements Used:

| Minimum: | H: 0-80    | N: 0-4 | O: 0-4 | S: 0-1 | Cl: 0-1 |                |  |
|----------|------------|--------|--------|--------|---------|----------------|--|
| Maximum: |            |        |        |        |         |                |  |
| Mass     | Calc. Mass | mDa    | PPM    | DBE    | i-FIT   | Formula        |  |
| 206.0509 | 206.0514   | -0.5   | -2.4   | 7.0    | 61.5    | C10 H10 N2 O S |  |
|          | 206.0519   | -1.0   | -4.9   | 2.5    | 6656.9  | C7 H13 N3 S Cl |  |

Shanghai Mass Spectrometry

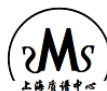

Center

Shanghai Institute of Organic

Chemistry

Chinese Academic of Sciences  
High Resolution MS Data

Report

Instrument: Waters Micromass GCT Premier Ionisation Mode: EI+ Electron Energy: 70eV

Card Serial Number: GCT-P-T11-04-050312

Sample Serial Number: HBSF-HT-10

Operator: Li

Date: 2011/04/28

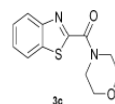

Elemental Composition Report

Single Mass Analysis

Tolerance = 5.0 PPM / DBE: min = -1.5, max = 50.0

Element prediction: Off

Monoisotopic Mass, Odd and Even Electron Ions

297 formula(e) evaluated with 4 results within limits (all results (up to 1000) for each mass)

Elements Used:

C: 0-60 H: 0-80 N: 0-4 O: 0-4 S: 0-1 Cl: 0-1

Minimum: -1.5

Maximum: 50.0

| Mass     | Calc. Mass | mDa  | PPM  | DBE  | i-FIT | Formula          |
|----------|------------|------|------|------|-------|------------------|
| 248.0616 | 248.0619   | -0.3 | -1.2 | 8.0  | 105.9 | C12 H12 N2 O2 S  |
|          | 248.0624   | -0.8 | -3.2 | 3.5  | 241.4 | C9 H15 N3 O S Cl |
|          | 248.0626   | -1.0 | -4.0 | 17.0 | 125.0 | C20 H8           |
|          | 248.0604   | 1.2  | 4.8  | 8.0  | 164.9 | C14 H13 O2 Cl    |

Shanghai Mass Spectrometry

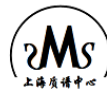

Center

Shanghai Institute of Organic

Chemistry

Chinese Academic of Sciences  
High Resolution MS Data

Report

Instrument: Waters Micromass GCT Premier Ionisation Mode: EI+ Electron Energy: 70eV

Card Serial Number: GCT-P-T11-04-050305

Sample Serial Number: HBSF-HT-3

Operator: Li

Date: 2011/04/28

Elemental Composition Report

Single Mass Analysis

Tolerance = 5.0 PPM / DBE: min = -1.5, max = 50.0

Element prediction: Off

Monoisotopic Mass, Odd and Even Electron Ions

160 formula(e) evaluated with 2 results within limits (all results (up to 1000) for each mass)

Elements Used:

C: 0-60 H: 0-80 N: 0-4 O: 0-4 Cl: 0-1

Minimum: -1.5

Maximum: 50.0

| Mass     | Calc. Mass | mDa  | PPM  | DBE  | i-FIT   | Formula         |
|----------|------------|------|------|------|---------|-----------------|
| 252.0897 | 252.0899   | -0.2 | -0.8 | 11.0 | 254.9   | C15 H12 N2 O2   |
|          | 252.0904   | -0.7 | -2.8 | 6.5  | 10236.4 | C12 H15 N3 O Cl |

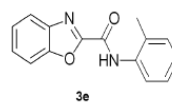

Shanghai Mass Spectrometry

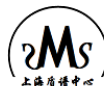

Center  
Chemistry

Shanghai Institute of Organic  
Chinese Academic of Sciences  
High Resolution MS Data

Report

Instrument: Waters Micromass GCT Premier Ionisation Mode: EI+ Electron Energy: 70eV

Card Serial Number: GCT-P-T11-04-OS0303

Sample Serial Number: HBSF-HT-1

Operator: Li

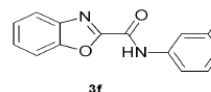

Date: 2011/04/28

Elemental Composition Report

Single Mass Analysis

Tolerance = 5.0 PPM / DBE: min = -1.5, max = 50.0

Element prediction: Off

Monoisotopic Mass, Odd and Even Electron Ions

160 formula(e) evaluated with 2 results within limits (all results (up to 1000) for each mass)

Elements Used:

C: 0-60 H: 0-80 N: 0-4 O: 0-4 Cl: 0-1

Minimum: -1.5

Maximum: 50.0

| Mass     | Calc. Mass | mDa  | PPM  | DBE  | i-FIT  | Formula         |
|----------|------------|------|------|------|--------|-----------------|
| 252.0900 | 252.0899   | 0.1  | 0.4  | 11.0 | 924.3  | C15 H12 N2 O2   |
|          | 252.0904   | -0.4 | -1.6 | 6.5  | 6571.1 | C12 H15 N3 O Cl |

Shanghai Mass Spectrometry

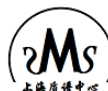

Center  
Chemistry

Shanghai Institute of Organic  
Chinese Academic of Sciences  
High Resolution MS Data

Report

Instrument: Waters Micromass GCT Premier Ionisation Mode: EI+ Electron Energy: 70eV

Card Serial Number: GCT-P-T11-04-OS0304

Sample Serial Number: HBSF-HT-2

Operator: Li

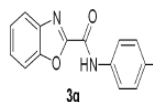

Date: 2011/04/28

Elemental Composition Report

Single Mass Analysis

Tolerance = 5.0 PPM / DBE: min = -1.5, max = 50.0

Element prediction: Off

Monoisotopic Mass, Odd and Even Electron Ions

160 formula(e) evaluated with 2 results within limits (all results (up to 1000) for each mass)

Elements Used:

C: 0-60 H: 0-80 N: 0-4 O: 0-4 Cl: 0-1

Minimum: -1.5

Maximum: 50.0

| Mass     | Calc. Mass | mDa  | PPM  | DBE  | i-FIT   | Formula         |
|----------|------------|------|------|------|---------|-----------------|
| 252.0901 | 252.0899   | 0.2  | 0.8  | 11.0 | 473.7   | C15 H12 N2 O2   |
|          | 252.0904   | -0.3 | -1.2 | 6.5  | 13966.1 | C12 H15 N3 O Cl |

Shanghai Mass Spectrometry

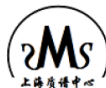

Center

Chemistry

Shanghai Institute of Organic

Chinese Academic of Sciences  
High Resolution MS Data

Report

Instrument: Waters Micromass GCT Premier Ionisation Mode: EI+ Electron Energy: 70eV  
Card Serial Number: GCT-P-T11-04-OS0306

Sample Serial Number: HBSF-HT-4

Operator: Li

Date: 2011/04/28

Elemental Composition Report

Single Mass Analysis

Tolerance = 5.0 PPM / DBE: min = -1.5, max = 50.0

Element prediction: Off

Monoisotopic Mass, Odd and Even Electron Ions

170 formula(e) evaluated with 2 results within limits (all results (up to 1000) for each mass)

Elements Used:

C: 0-60 H: 0-80 N: 0-4 O: 0-4 Cl: 0-1

Minimum: -1.5

Maximum: 50.0

| Mass     | Calc. Mass | mDa  | PPM  | DBE  | i-FIT  | Formula          |
|----------|------------|------|------|------|--------|------------------|
| 268.0847 | 268.0848   | -0.1 | -0.4 | 11.0 | 275.1  | C15 H12 N2 O3    |
|          | 268.0853   | -0.6 | -2.2 | 6.5  | 2188.1 | C12 H15 N3 O2 Cl |

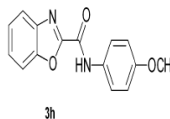

Shanghai Mass Spectrometry

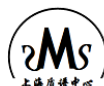

Center

Chemistry

Shanghai Institute of Organic

Chinese Academic of Sciences  
High Resolution MS Data

Report

Instrument: Waters Micromass GCT Premier Ionisation Mode: EI+ Electron Energy: 70eV  
Card Serial Number: GCT-P-T11-04-OS0308

Sample Serial Number: HBSF-HT-6

Operator: Li

Date: 2011/04/28

Elemental Composition Report

Single Mass Analysis

Tolerance = 5.0 PPM / DBE: min = -1.5, max = 50.0

Element prediction: Off

Monoisotopic Mass, Odd and Even Electron Ions

148 formula(e) evaluated with 2 results within limits (all results (up to 1000) for each mass)

Elements Used:

C: 0-60 H: 0-80 N: 0-4 O: 0-4 Cl: 0-1

Minimum: -1.5

Maximum: 50.0

| Mass     | Calc. Mass | mDa  | PPM  | DBE | i-FIT     | Formula         |
|----------|------------|------|------|-----|-----------|-----------------|
| 230.1056 | 230.1055   | 0.1  | 0.4  | 8.0 | 2773059.0 | C13 H14 N2 O2   |
|          | 230.1060   | -0.4 | -1.7 | 3.5 | 101.9     | C10 H17 N3 O Cl |

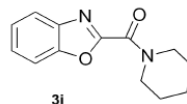

Shanghai Mass Spectrometry

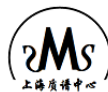

Center

Shanghai Institute of Organic

Chemistry

Chinese Academic of Sciences  
High Resolution MS Data

Report

**Instrument:** Waters Micromass GCT Premier      **Ionisation Mode:** EI+      **Electron Energy:** 70eV

Card Serial Number: GCT-P-T11-04-050307

Sample Serial Number: HBSF-HT-5

Operator: Li

Date: 2011/04/28

Elemental Composition Report

Single Mass Analysis

Tolerance = 5.0 PPM / DBE: min = -1.5, max = 50.0

Element prediction: Off

Monoisotopic Mass, Odd and Even Electron Ions

157 formula(e) evaluated with 2 results within limits (all results (up to 1000) for each mass)

Elements Used:

C: 0-60 H: 0-80 N: 0-4 O: 0-4 Cl: 0-1

Minimum:

Maximum: -1.5 50.0

Mass

| Mass     | Calc. Mass | mDa  | PPM  | DBE | i-FIT  | Formula         |
|----------|------------|------|------|-----|--------|-----------------|
| 244.1210 | 244.1212   | -0.2 | -0.8 | 8.0 | 111.6  | C14 H16 N2 O2   |
|          | 244.1217   | -0.7 | -2.9 | 3.5 | 5911.4 | C11 H19 N3 O C1 |

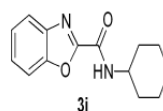

3j

Shanghai Mass Spectrometry

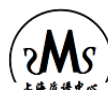

Center

Shanghai Institute of Organic

Chemistry

Chinese Academic of Sciences  
High Resolution MS Data

Report

**Instrument:** Waters Micromass GCT Premier      **Ionisation Mode:** EI+      **Electron Energy:** 70eV

Card Serial Number: GCT-P-T11-04-050309

Sample Serial Number: HBSF-HT-7

Operator: Li

Date: 2011/04/28

Elemental Composition Report

Single Mass Analysis

Tolerance = 5.0 PPM / DBE: min = -1.5, max = 50.0

Element prediction: Off

Monoisotopic Mass, Odd and Even Electron Ions

148 formula(e) evaluated with 2 results within limits (all results (up to 1000) for each mass)

Elements Used:

C: 0-60 H: 0-80 N: 0-4 O: 0-4 Cl: 0-1

Minimum:

Maximum: -1.5 50.0

Mass

| Mass     | Calc. Mass | mDa | PPM | DBE | i-FIT     | Formula         |
|----------|------------|-----|-----|-----|-----------|-----------------|
| 232.0853 | 232.0853   | 0.0 | 0.0 | 3.5 | 2777596.3 | C9 H15 N3 O2 C1 |
|          | 232.0848   | 0.5 | 2.2 | 8.0 | 2775863.5 | C12 H12 N2 O3   |

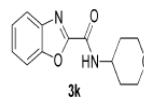

3k

Shanghai Mass Spectrometry

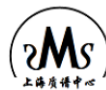

Center  
 Chemistry

Shanghai Institute of Organic  
 Chinese Academic of Sciences  
 High Resolution MS Data

Report

Instrument: Waters Micromass GCT Premier Ionisation Mode: EI+ Electron Energy: 70eV  
 Card Serial Number: GCT-P-T11-04-OS0310

Sample Serial Number: HBSF-HT-8

Operator: Li

Date: 2011/04/28

Elemental Composition Report

Single Mass Analysis

Tolerance = 5.0 PPM / DBE: min = -1.5, max = 50.0

Element prediction: Off

Monoisotopic Mass, Odd and Even Electron Ions

160 formula(e) evaluated with 2 results within limits (all results (up to 1000) for each mass)

Elements Used:

C: 0-60 H: 0-80 N: 0-4 O: 0-4 Cl: 0-1

Minimum: -1.5

Maximum: 50.0

Mass Calc. Mass mDa PPM DBE i-FIT Formula

252.0665 252.0666 -0.1 -0.4 7.0 5546559.0 C12 H13 N2 O2 Cl

252.0661 0.4 1.6 11.5 2773647.5 C15 H10 N O3

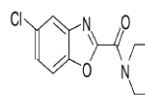

3m

Shanghai Mass Spectrometry

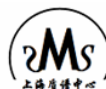

Center  
 Chemistry

Shanghai Institute of Organic  
 Chinese Academic of Sciences  
 High Resolution MS Data

Report

Instrument: Waters Micromass GCT Premier Ionisation Mode: EI+ Electron Energy: 70eV  
 Card Serial Number: GCT-P-T11-05-OS0468

Sample Serial Number: HBSF-HT-Sample-3

Operator: Li

Date: 2011/06/20

Elemental Composition Report

Single Mass Analysis

Tolerance = 5.0 PPM / DBE: min = -1.5, max = 50.0

Element prediction: Off

Monoisotopic Mass, Odd and Even Electron Ions

524 formula(e) evaluated with 2 results within limits (all results (up to 1000) for each mass)

Elements Used:

C: 0-60 H: 0-80 N: 0-4 O: 0-4 F: 0-1 S: 0-1 Cl: 0-1

Minimum: -1.5

Maximum: 50.0

Mass Calc. Mass mDa PPM DBE i-FIT Formula

232.1211 232.1212 -0.1 -0.4 7.0 5546214.5 C13 H16 N2 O2

232.1217 -0.6 -2.6 2.5 5546232.0 C10 H19 N3 O Cl

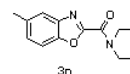

3n

Shanghai Mass Spectrometry

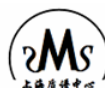

Center

Shanghai Institute of Organic

Chemistry

Chinese Academic of Sciences  
High Resolution MS Data

Report

Instrument: Waters Micromass GCT Premier Ionisation Mode: EI+ Electron Energy: 70eV

Card Serial Number: GCT-P-T11-05-OS0466

Sample Serial Number: HBSF-HT-Sample-1

Operator: Li

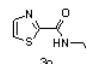

Date: 2011/06/20

Elemental Composition Report

Single Mass Analysis

Tolerance = 5.0 PPM / DBE: min = -1.5, max = 50.0

Element prediction: Off

Monoisotopic Mass, Odd and Even Electron Ions

177 formula(e) evaluated with 2 results within limits (all results (up to 1000) for each mass)

Elements Used:

C: 0-60 H: 0-80 N: 0-4 O: 0-4 S: 0-1 Cl: 0-1

Minimum:

Maximum: 1.5 5.0 50.0

| Mass     | Calc. Mass | mDa  | PPM  | DBE  | i-FIT | Formula        |
|----------|------------|------|------|------|-------|----------------|
| 156.0355 | 156.0357   | -0.2 | -1.3 | 4.0  | 23.7  | C6 H8 N2 O S   |
|          | 156.0362   | -0.7 | -4.5 | -0.5 | 902.8 | C3 H11 N3 S Cl |

Shanghai Mass Spectrometry

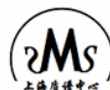

Center

Shanghai Institute of Organic

Chemistry

Chinese Academic of Sciences  
High Resolution MS Data

Report

Instrument: Waters Micromass GCT Premier Ionisation Mode: EI+ Electron Energy: 70eV

Card Serial Number: GCT-P-T11-05-OS0467

Sample Serial Number: HBSF-HT-Sample-2

Operator: Li

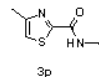

Date: 2011/06/20

Elemental Composition Report

Single Mass Analysis

Tolerance = 5.0 PPM / DBE: min = -1.5, max = 50.0

Element prediction: Off

Monoisotopic Mass, Odd and Even Electron Ions

355 formula(e) evaluated with 2 results within limits (all results (up to 1000) for each mass)

Elements Used:

C: 0-60 H: 0-80 N: 0-4 O: 0-4 F: 0-1 S: 0-1 Cl: 0-1

Minimum:

Maximum: 1.5 5.0 50.0

| Mass     | Calc. Mass | mDa  | PPM  | DBE | i-FIT | Formula        |
|----------|------------|------|------|-----|-------|----------------|
| 170.0510 | 170.0510   | 0.0  | 0.0  | 0.0 | 424.7 | C6 H12 O2 F Cl |
|          | 170.0514   | -0.4 | -2.4 | 4.0 | 7.6   | C7 H10 N2 O S  |

Shanghai Mass Spectrometry

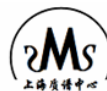

Center

Chemistry

Shanghai Institute of Organic

Chinese Academic of Sciences  
High Resolution MS Data

Report

Instrument: Waters Micromass GCT Premier Ionisation Mode: EI+ Electron Energy: 70eV

Card Serial Number: GCT-P-T11-05-OS0469

Sample Serial Number: HBSF-HT-Sample-4

Operator: Li

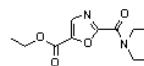

3q

Date: 2011/06/20

Elemental Composition Report

Single Mass Analysis

Tolerance = 5.0 PPM / DBE: min = -1.5, max = 50.0

Element prediction: Off

Monoisotopic Mass, Odd and Even Electron Ions

534 formula(e) evaluated with 3 results within limits (all results (up to 1000) for each mass)

Elements Used:

C: 0-60 H: 0-80 N: 0-4 O: 0-4 F: 0-1 S: 0-1 Cl: 0-1

Minimum:

Maximum: 1.5 5.0 -1.5 50.0

| Mass | Calc. Mass | mDa | PPM | DBE | i-FIT | Formula |
|------|------------|-----|-----|-----|-------|---------|
|------|------------|-----|-----|-----|-------|---------|

|          |          |      |      |     |           |                 |
|----------|----------|------|------|-----|-----------|-----------------|
| 240.1114 | 240.1115 | -0.1 | -0.4 | 0.0 | 5546106.0 | C11 H22 F S Cl  |
|          | 240.1115 | -0.1 | -0.4 | 0.5 | 5546105.0 | C8 H19 N3 O3 Cl |
|          | 240.1110 | 0.4  | 1.7  | 5.0 | 5546085.5 | C11 H16 N2 O4   |

### 3. References

[1] Z.-X. Zhang, Z.-W. Yin, J. F. Kadow, N. A. Meanwell and T. Wang, *Synlett*, 2004, **13**, 2323–2326.

[2] Z.-X. Zhang, Z.-W. Yin, J. F. Kadow, N. A. Meanwell and T. Wang, *J. Org. Chem.*, 2004, **69**, 1360–1363.
